# Supplementary material
Source: PubMed Central journal article supplement (PMC5360918)
Supplement: rspb20162501supp1.pdf [file rspb20162501supp1.pdf]

## Supplement S1 - Details of sampling locations

Baker CCM, Martins DJ, Pelaez JN, Billen JPJ, Pringle A, Frederickson ME & NE Pierce (2017). Distinctive fungal communities in an obligate African ant plant mutualism. *Proceedings of the Royal Society B* 20162501. <http://dx.doi.org/10.1098/rspb.2016.2501>

| Site name   | Location                                                                       | Latitude  | Longitude | Elevation |
|-------------|--------------------------------------------------------------------------------|-----------|-----------|-----------|
| Greenhouse  | Museum of Comparative Zoology Labs,<br>Harvard University, Cambridge MA, USA   | 42°22.8'N | 71°06.9'W | 50m asl   |
| Kitengela   | undeveloped land outside Nairobi National<br>Park, Kajiado North County, Kenya | 1°23.8'S  | 36°49.5'E | 1650m asl |
| Mpala       | Mpala Research Center, Laikipia County,<br>Kenya                               | 0°18.8'N  | 36°52.5'E | 1800m asl |
| Ngong Hills | Kajiado North District, Kenya                                                  | 1°26.0'S  | 36°38.0'E | 2000m asl |
