# Supplementary material
Source: PubMed Central journal article supplement (PMC5360918)
Supplement: rspb20162501supp2.pdf [file rspb20162501supp2.pdf]

## Supplement S2 - Summary of domatium metabarcoding sample sizes

Baker CCM, Martins DJ, Pelaez JN, Billen JPJ, Pringle A, Frederickson ME & NE Pierce (2017). Distinctive fungal communities in an obligate African ant plant mutualism. *Proceedings of the Royal Society B* 20162501. <http://dx.doi.org/10.1098/rspb.2016.2501>

| Ant species         | Domatia |           |            | Leaves | Alates    |
|---------------------|---------|-----------|------------|--------|-----------|
|                     | Mpala   | Kitengela | greenhouse | Mpala  | Kitengela |
| <i>C. mimosae</i>   | 13      | 7         | 3          | 3      | -         |
| <i>C. nigriceps</i> | 9       | 8         | 8          | -      | 13*       |
| <i>T. penzigi</i>   | 13      | 6         | 2          | 3      | 3*        |

\* We extracted from 22 surface sterilized CN alates and 10 surface sterilized TP alates, but were unable to PCR amplify from 11 of these samples. A further 5 samples failed 454 sequencing or returned low 454 sequence counts. Only data from the remaining 13 CN alates and 3 TP alates were used in our analysis.
