# Supplementary material
Source: PubMed Central journal article supplement (PMC5360918)
Supplement: rspb20162501supp4.pdf [file rspb20162501supp4.pdf]

## Supplement S4 - Taxonomic assignments to operational taxonomic units

Baker CCM, Martins DJ, Pelaez JN, Billen JPJ, Pringle A, Frederickson ME & NE Pierce (2017). Distinctive fungal communities in an obligate African ant plant mutualism. *Proceedings of the Royal Society B* 20162501. <http://dx.doi.org/10.1098/rspb.2016.2501>

| OTU | phylum        | class              | order             | family             | genus                    | species                               |
|-----|---------------|--------------------|-------------------|--------------------|--------------------------|---------------------------------------|
| 0   | Basidiomycota | Tremellomycetes    | Tremellales       | NA                 | <i>Cryptococcus</i>      | <i>Cryptococcus</i> sp. CBS 9459      |
| 1   | Ascomycota    | NA                 | NA                | NA                 | NA                       | ascomycete sp. HK-S281                |
| 2   | Basidiomycota | Tremellomycetes    | Tremellales       | NA                 | <i>Cryptococcus</i>      | <i>Cryptococcus armeniacus</i>        |
| 3   | Basidiomycota | Tremellomycetes    | Tremellales       | NA                 | <i>Cryptococcus</i>      | <i>Cryptococcus</i> sp. KCY-9         |
| 4   | Ascomycota    | Dothideomycetes    | Capnodiales       | Teratosphaeriaceae | <i>Teratosphaeria</i>    | <i>Teratosphaeria</i> sp. CPC 13963   |
| 5   | Basidiomycota | Microbotryomycetes | Sporidiobolales   | NA                 | <i>Sporobolomyces</i>    | <i>Sporobolomyces alborubescens</i>   |
| 6   | Ascomycota    | Sordariomycetes    | Hypocreales       | Clavicipitaceae    | <i>Claviceps</i>         | <i>Claviceps</i> sp. ICMP 16980       |
| 7   | Ascomycota    | Sordariomycetes    | Hypocreales       | Nectriaceae        | <i>Fusarium</i>          | <i>Fusarium brevicatenulatum</i>      |
| 8   | Basidiomycota | Tremellomycetes    | Tremellales       | NA                 | <i>Cryptococcus</i>      | <i>Cryptococcus cuniculi</i>          |
| 9   | Ascomycota    | Dothideomycetes    | Capnodiales       | Mycosphaerellaceae | <i>Ramularia</i>         | <i>Ramularia endophylla</i>           |
| 10  | Ascomycota    | Dothideomycetes    | Capnodiales       | Teratosphaeriaceae | <i>Teratosphaericola</i> | <i>Teratosphaericola pseudaficana</i> |
| 11  | Ascomycota    | Eurotiomycetes     | Eurotiales        | Thermoascaceae     | <i>Byssochlamys</i>      | <i>Byssochlamys nivea</i>             |
| 12  | Ascomycota    | Sordariomycetes    | Microascales      | Halosphaeriaceae   | <i>Periconia</i>         | <i>Periconia</i> sp. CY191            |
| 13  | Ascomycota    | Dothideomycetes    | Capnodiales       | Mycosphaerellaceae | <i>Phloeospora</i>       | <i>Phloeospora mimosae-pigrae</i>     |
| 14  | Ascomycota    | NA                 | NA                | NA                 | <i>Monocillium</i>       | <i>Monocillium</i> sp. 15H3b8epi      |
| 15  | Ascomycota    | Dothideomycetes    | Botryosphaeriales | Botryosphaeriaceae | <i>Botryosphaeria</i>    | <i>Botryosphaeria dothidea</i>        |
| 16  | Ascomycota    | Saccharomycetes    | Saccharomycetales | Debaryomycetaceae  | <i>Candida</i>           | <i>Candida parapsilosis</i>           |
| 17  | Ascomycota    | Dothideomycetes    | Pleosporales      | Didymellaceae      | <i>Didymella</i>         | <i>Didymella exitialis</i>            |
| 18  | Ascomycota    | Sordariomycetes    | Hypocreales       | NA                 | <i>Eucasphaeria</i>      | <i>Eucasphaeria capensis</i>          |
| 19  | Ascomycota    | NA                 | NA                | NA                 | <i>Acremonium</i>        | <i>Acremonium charticola</i>          |
| 20  | Ascomycota    | Dothideomycetes    | Pleosporales      | Pleosporaceae      | <i>Curvularia</i>        | <i>Curvularia trifolii</i>            |
| 21  | Ascomycota    | Sordariomycetes    | Hypocreales       | Nectriaceae        | <i>Fusarium</i>          | <i>Fusarium oxysporum</i>             |
| 22  | Basidiomycota | Tremellomycetes    | Filobasidiales    | NA                 | <i>Cryptococcus</i>      | <i>Cryptococcus oeirensis</i>         |
| 23  | Ascomycota    | NA                 | NA                | NA                 | NA                       | <i>Ascomycota</i> sp. AR-2010         |
| 24  | Basidiomycota | Tremellomycetes    | Tremellales       | NA                 | <i>Cryptococcus</i>      | <i>Cryptococcus</i> sp. DMKU-CP250    |
| 25  | Ascomycota    | NA                 | NA                | NA                 | NA                       | ascomycete sp. VTT D-041033           |
| 26  | Basidiomycota | Tremellomycetes    | Tremellales       | NA                 | <i>Fellomyces</i>        | <i>Fellomyces polyborus</i>           |

| OTU | phylum        | class           | order             | family             | genus                     | species                             |
|-----|---------------|-----------------|-------------------|--------------------|---------------------------|-------------------------------------|
| 27  | Ascomycota    | NA              | NA                | NA                 | NA                        | Ascomycota sp. dd08057              |
| 28  | Ascomycota    | Dothideomycetes | Pleosporales      | NA                 | NA                        | Pleosporales sp. LH241              |
| 29  | Basidiomycota | Tremellomycetes | Tremellales       | Tremellaceae       | <i>Filobasidiella</i>     | <i>Cryptococcus neoformans</i>      |
| 30  | Ascomycota    | Sordariomycetes | Calosphaeriales   | Calosphaeriaceae   | <i>Phaeoacremonium</i>    | <i>Phaeoacremonium fuscum</i>       |
| 31  | Ascomycota    | Dothideomycetes | Dothideales       | Aureobasidiaceae   | <i>Aureobasidium</i>      | <i>Aureobasidium pullulans</i>      |
| 32  | Ascomycota    | NA              | NA                | NA                 | <i>Trullula</i>           | <i>Trullula melanochlora</i>        |
| 33  | Ascomycota    | Dothideomycetes | Capnodiales       | Cladosporiaceae    | <i>Cladosporium</i>       | <i>Cladosporium cladosporioides</i> |
| 34  | Ascomycota    | Dothideomycetes | Capnodiales       | Cladosporiaceae    | <i>Toxicocladosporium</i> | <i>Toxicocladosporium veloxum</i>   |
| 35  | Ascomycota    | Dothideomycetes | Pleosporales      | Pleosporaceae      | <i>Alternaria</i>         | <i>Alternaria</i> sp. XF6           |
| 36  | Ascomycota    | Sordariomycetes | Hypocreales       | Bionectriaceae     | NA                        | Bionectriaceae sp. MS64             |
| 37  | Ascomycota    | Sordariomycetes | Xylariales        | Amphisphaeriaceae  | <i>Discostroma</i>        | <i>Discostroma fuscillum</i>        |
| 38  | Ascomycota    | Sordariomycetes | NA                | NA                 | <i>Myrmecridium</i>       | <i>Myrmecridium phragmitis</i>      |
| 39  | Ascomycota    | NA              | NA                | NA                 | <i>Acremonium</i>         | <i>Acremonium</i> sp. CBS 115996    |
| 40  | Ascomycota    | NA              | NA                | NA                 | <i>Acremonium</i>         | <i>Acremonium</i> sp. CBS 115996    |
| 41  | Ascomycota    | Sordariomycetes | Hypocreales       | NA                 | NA                        | Hypocreales sp. Vega851             |
| 42  | Basidiomycota | NA              | NA                | NA                 | NA                        | Basidiomycota sp. MT0811            |
| 43  | NA            | NA              | NA                | NA                 | NA                        | fungal sp. ARIZ AZ1016              |
| 44  | Ascomycota    | Sordariomycetes | Hypocreales       | Bionectriaceae     | NA                        | Bionectriaceae sp. MS64             |
| 45  | Ascomycota    | Dothideomycetes | Capnodiales       | Teratosphaeriaceae | <i>Teratosphaeria</i>     | <i>Teratosphaeria</i> sp. CPC 13963 |
| 46  | Ascomycota    | Sordariomycetes | Hypocreales       | NA                 | <i>Acremonium</i>         | <i>Acremonium sclerotigenum</i>     |
| 47  | Ascomycota    | Sordariomycetes | Hypocreales       | Hypocreaceae       | <i>Hypocrea</i>           | <i>Hypocrea</i> sp. KBS0814F        |
| 48  | Ascomycota    | Dothideomycetes | Pleosporales      | Lophiostomataceae  | <i>Lophiostoma</i>        | <i>Lophiostoma caulium</i>          |
| 49  | Basidiomycota | Tremellomycetes | Tremellales       | NA                 | <i>Cryptococcus</i>       | <i>Cryptococcus</i> sp. MA68d       |
| 50  | Ascomycota    | Sordariomycetes | Trichosphaeriales | Trichosphaeriaceae | <i>Nigrospora</i>         | <i>Nigrospora oryzae</i>            |
| 51  | NA            | NA              | NA                | NA                 | NA                        | fungal sp. VKM FW-2422              |
| 52  | Ascomycota    | Dothideomycetes | Pleosporales      | Didymellaceae      | <i>Phoma</i>              | <i>Phoma</i> sp. xz26               |
| 53  | Ascomycota    | NA              | NA                | NA                 | NA                        | Ascomycota sp. AR-2010              |
| 54  | Ascomycota    | Dothideomycetes | Pleosporales      | Didymosphaeriaceae | <i>Paraphaeosphaeria</i>  | <i>Paraphaeosphaeria sporulosa</i>  |
| 55  | Basidiomycota | Tremellomycetes | Tremellales       | NA                 | <i>Dioszegia</i>          | <i>Dioszegia zsołtii</i>            |
| 56  | Ascomycota    | Dothideomycetes | Pleosporales      | NA                 | NA                        | Pleosporales sp. VegaE3-54          |
| 57  | NA            | NA              | Mortierellales    | Mortierellaceae    | <i>Mortierella</i>        | <i>Mortierella</i> sp. CF15         |
| 58  | Ascomycota    | Dothideomycetes | Capnodiales       | Mycosphaerellaceae | <i>Mycosphaerella</i>     | <i>Mycosphaerella brassicicola</i>  |

| OTU | phylum        | class             | order            | family             | genus                     | species                                    |
|-----|---------------|-------------------|------------------|--------------------|---------------------------|--------------------------------------------|
| 59  | Ascomycota    | Dothideomycetes   | Capnodiales      | Cladosporiaceae    | <i>Cladosporium</i>       | <i>Cladosporium psychrotolerans</i>        |
| 60  | Ascomycota    | Sordariomycetes   | Hypocreales      | Bionectriaceae     | NA                        | Bionectriaceae sp. MS64                    |
| 61  | Basidiomycota | Tremellomycetes   | Tremellales      | NA                 | <i>Cryptococcus</i>       | <i>Cryptococcus cuniculi</i>               |
| 62  | Ascomycota    | Dothideomycetes   | Capnodiales      | Cladosporiaceae    | <i>Cladosporium</i>       | <i>Cladosporium</i> sp. 01                 |
| 63  | NA            | NA                | NA               | NA                 | NA                        | fungal sp. F161                            |
| 64  | Ascomycota    | Eurotiomycetes    | Eurotiales       | Aspergillaceae     | <i>Aspergillus</i>        | <i>Aspergillus</i> sp. JS1081              |
| 65  | Ascomycota    | Sordariomycetes   | Hypocreales      | NA                 | <i>Eucasphaeria</i>       | <i>Eucasphaeria capensis</i>               |
| 66  | Basidiomycota | Exobasidiomycetes | Exobasidiales    | Exobasidiaceae     | <i>Exobasidium</i>        | <i>Exobasidium pachysporum</i>             |
| 67  | Ascomycota    | Dothideomycetes   | Capnodiales      | Teratosphaeriaceae | <i>Devriesia</i>          | <i>Devriesia</i> sp. 37NNYY8ZZ4-1          |
| 68  | Ascomycota    | Sordariomycetes   | Xylariales       | Coniocessiaceae    | <i>Coniocessia</i>        | <i>Coniocessia nodulisporioides</i>        |
| 69  | Ascomycota    | Dothideomycetes   | Pleosporales     | Massariaceae       | <i>Massarina</i>          | <i>Massarina rubi</i>                      |
| 70  | Ascomycota    | Lecanoromycetes   | Peltigerales     | Pannariaceae       | <i>Pannaria</i>           | <i>Pannaria calophylla</i>                 |
| 71  | Ascomycota    | Dothideomycetes   | Pleosporales     | Didymellaceae      | <i>Peyronellaea</i>       | <i>Peyronellaea glomerata</i>              |
| 72  | Basidiomycota | Tremellomycetes   | Tremellales      | NA                 | <i>Cryptococcus</i>       | <i>Cryptococcus shivajii</i>               |
| 73  | Basidiomycota | Tremellomycetes   | Tremellales      | NA                 | <i>Cryptococcus</i>       | <i>Cryptococcus dimennae</i>               |
| 74  | Basidiomycota | Tremellomycetes   | Tremellales      | NA                 | <i>Bullera</i>            | <i>Bullera dendrophila</i>                 |
| 75  | Ascomycota    | Dothideomycetes   | Capnodiales      | Cladosporiaceae    | <i>Toxicocladosporium</i> | <i>Toxicocladosporium ficiniae</i>         |
| 76  | Ascomycota    | Dothideomycetes   | Capnodiales      | Mycosphaerellaceae | <i>Staninwardia</i>       | <i>Staninwardia suttonii</i>               |
| 77  | Ascomycota    | NA                | NA               | NA                 | <i>Microsphaeropsis</i>   | <i>Microsphaeropsis arundinis</i>          |
| 78  | Ascomycota    | Dothideomycetes   | Pleosporales     | Pleosporaceae      | <i>Alternaria</i>         | <i>Alternaria alternata</i>                |
| 79  | NA            | NA                | NA               | NA                 | NA                        | fungal endophyte                           |
| 80  | Ascomycota    | Dothideomycetes   | Pleosporales     | Pleosporaceae      | <i>Drechslera</i>         | <i>Drechslera fugax</i>                    |
| 81  | Basidiomycota | Exobasidiomycetes | Microstromatales | NA                 | <i>Rhodotorula</i>        | <i>Rhodotorula</i> sp. JCM 11351           |
| 82  | Ascomycota    | Dothideomycetes   | Capnodiales      | Teratosphaeriaceae | <i>Devriesia</i>          | <i>Devriesia lagerstroemiae</i>            |
| 83  | Ascomycota    | Dothideomycetes   | Capnodiales      | Teratosphaeriaceae | <i>Xenoteratosphaeria</i> | <i>Xenoteratosphaeria jonkershoekensis</i> |
| 84  | Ascomycota    | Dothideomycetes   | Capnodiales      | NA                 | <i>Eriosporella</i>       | <i>Eriosporella</i> sp. DQD-2013           |
| 85  | Basidiomycota | Tremellomycetes   | Tremellales      | NA                 | <i>Cryptococcus</i>       | <i>Cryptococcus victoriae</i>              |
| 86  | Ascomycota    | Dothideomycetes   | Pleosporales     | Didymellaceae      | <i>Phoma</i>              | <i>Phoma</i> sp. F226                      |
| 87  | Ascomycota    | Lecanoromycetes   | Ostropales       | NA                 | NA                        | Ostropales sp. s056                        |
| 88  | Ascomycota    | NA                | NA               | NA                 | NA                        | Ascomycota sp. 16 MLS-2010                 |
| 89  | Ascomycota    | NA                | NA               | NA                 | NA                        | Ascomycota sp. AR-2010                     |
| 90  | Basidiomycota | Tremellomycetes   | NA               | NA                 | <i>Cryptococcus</i>       | <i>Cryptococcus</i> sp. 3 TMS-2011         |

| OTU | phylum        | class               | order              | family               | genus                  | species                                            |
|-----|---------------|---------------------|--------------------|----------------------|------------------------|----------------------------------------------------|
| 91  | Ascomycota    | Dothideomycetes     | Capnodiales        | Cladosporiaceae      | <i>Cladosporium</i>    | <i>Cladosporium phyllophilum</i>                   |
| 92  | Ascomycota    | Dothideomycetes     | Capnodiales        | Cladosporiaceae      | <i>Cladosporium</i>    | <i>Cladosporium</i> sp. TR031                      |
| 93  | Ascomycota    | Dothideomycetes     | Capnodiales        | Neodevriesiaceae     | NA                     | Neodevriesiaceae sp. CCFEE 5569                    |
| 94  | Ascomycota    | Lecanoromycetes     | Ostropales         | Stictidaceae         | <i>Glomerobolus</i>    | <i>Glomerobolus gelineus</i>                       |
| 95  | NA            | NA                  | NA                 | NA                   | NA                     | fungal endophyte                                   |
| 96  | NA            | NA                  | NA                 | NA                   | NA                     | fungal endophyte                                   |
| 97  | Ascomycota    | Dothideomycetes     | Pleosporales       | NA                   | NA                     | Pleosporales sp. VKM-3176                          |
| 98  | Ascomycota    | NA                  | NA                 | NA                   | NA                     | Ascomycota sp. LEst04                              |
| 99  | Basidiomycota | Cystobasidiomycetes | Erythrobasidiales  | Erythrobasidiaceae   | <i>Sporobolomyces</i>  | <i>Sporobolomyces gracilis</i>                     |
| 100 | NA            | NA                  | NA                 | NA                   | NA                     | Calluna vulgaris root associated fungus            |
| 101 | Ascomycota    | Dothideomycetes     | Capnodiales        | NA                   | NA                     | Capnodiales sp. BN-Lon33-1                         |
| 102 | Ascomycota    | Eurotiomycetes      | Eurotiales         | Aspergillaceae       | <i>Aspergillus</i>     | <i>Aspergillus versicolor</i>                      |
| 103 | Ascomycota    | Dothideomycetes     | Dothideales        | Aureobasidiaceae     | <i>Pseudosydowia</i>   | <i>Pseudosydowia eucalypti</i>                     |
| 104 | Basidiomycota | Tremellomycetes     | Tremellales        | NA                   | <i>Cryptococcus</i>    | <i>Cryptococcus</i> aff. <i>amylyticus</i> IP-2014 |
| 105 | NA            | NA                  | NA                 | NA                   | NA                     | fungal endophyte                                   |
| 106 | Ascomycota    | Dothideomycetes     | Botryosphaeriales  | Botryosphaeriaceae   | <i>Botryosphaeria</i>  | <i>Botryosphaeria dothidea</i>                     |
| 107 | Ascomycota    | Arthoniomycetes     | Lichenostigmatales | Phaeococcomycetaceae | <i>Phaeococcomyces</i> | <i>Phaeococcomyces eucalypti</i>                   |
| 108 | Ascomycota    | Dothideomycetes     | Capnodiales        | Dissoconiaceae       | <i>Dissoconium</i>     | <i>Dissoconium eucalypti</i>                       |
| 109 | NA            | NA                  | NA                 | NA                   | NA                     | fungal endophyte                                   |
| 110 | Basidiomycota | Tremellomycetes     | Tremellales        | NA                   | <i>Cryptococcus</i>    | <i>Cryptococcus laurentii</i>                      |
| 111 | Ascomycota    | Dothideomycetes     | Capnodiales        | Teratosphaeriaceae   | <i>Capnobotryella</i>  | <i>Capnobotryella</i> sp. MA 3619                  |
| 112 | Ascomycota    | Dothideomycetes     | Pleosporales       | Phaeosphaeriaceae    | <i>Phaeosphaeria</i>   | <i>Phaeosphaeria triglochinicola</i>               |
| 113 | Ascomycota    | Sordariomycetes     | Hypocreales        | NA                   | <i>Sarocladium</i>     | <i>Sarocladium strictum</i>                        |
| 114 | Ascomycota    | Dothideomycetes     | Capnodiales        | Mycosphaerellaceae   | <i>Staninwardia</i>    | <i>Staninwardia suttonii</i>                       |
| 115 | Ascomycota    | NA                  | NA                 | NA                   | NA                     | Ascomycota sp. MUT 4376                            |
| 116 | Ascomycota    | Dothideomycetes     | Capnodiales        | Cladosporiaceae      | <i>Cladosporium</i>    | <i>Cladosporium cladosporioides</i>                |
| 117 | Ascomycota    | Eurotiomycetes      | Eurotiales         | Aspergillaceae       | <i>Aspergillus</i>     | <i>Aspergillus</i> sp. F51                         |
| 118 | Ascomycota    | Dothideomycetes     | Botryosphaeriales  | Botryosphaeriaceae   | <i>Botryosphaeria</i>  | <i>Botryosphaeria dothidea</i>                     |
| 119 | NA            | NA                  | NA                 | NA                   | NA                     | fungal endophyte                                   |
| 120 | Ascomycota    | Dothideomycetes     | Capnodiales        | Teratosphaeriaceae   | <i>Devriesia</i>       | <i>Devriesia</i> sp. GSH2_8                        |
| 121 | Ascomycota    | Dothideomycetes     | Capnodiales        | Teratosphaeriaceae   | <i>Catenulostroma</i>  | <i>Catenulostroma protearum</i>                    |
| 122 | Ascomycota    | Eurotiomycetes      | Eurotiales         | Aspergillaceae       | <i>Penicillium</i>     | <i>Penicillium citrinum</i>                        |

| OTU | phylum        | class           | order             | family              | genus                     | species                                     |
|-----|---------------|-----------------|-------------------|---------------------|---------------------------|---------------------------------------------|
| 123 | Ascomycota    | Dothideomycetes | Capnodiales       | Cladosporiaceae     | <i>Toxicocladosporium</i> | <i>Toxicocladosporium strelitziae</i>       |
| 124 | Ascomycota    | Dothideomycetes | Pleosporales      | NA                  | NA                        | Pleosporales sp. Vega375                    |
| 125 | Ascomycota    | Dothideomycetes | Pleosporales      | Phaeosphaeriaceae   | <i>Phaeosphaeriopsis</i>  | <i>Phaeosphaeriopsis</i> sp. TMS-2011       |
| 126 | Ascomycota    | Dothideomycetes | Dothideales       | Aureobasidiaceae    | <i>Aureobasidium</i>      | <i>Aureobasidium</i> sp. PPV3_2             |
| 127 | Ascomycota    | Dothideomycetes | Capnodiales       | Mycosphaerellaceae  | <i>Mycosphaerella</i>     | <i>Mycosphaerella iridis</i>                |
| 128 | Ascomycota    | NA              | NA                | NA                  | <i>Acremonium</i>         | <i>Acremonium</i> sp. CBS 115996            |
| 129 | Basidiomycota | Agaricomycetes  | Trechisporales    | 'Trechisporaceae'   | <i>Sistotremastrum</i>    | <i>Sistotremastrum</i> sp. DLL2011-1        |
| 130 | Basidiomycota | Tremellomycetes | Filobasidiales    | NA                  | <i>Cryptococcus</i>       | <i>Cryptococcus</i> sp. JJP-2009a           |
| 131 | Ascomycota    | Sordariomycetes | Hypocreales       | Nectriaceae         | <i>Nectria</i>            | <i>Nectria aurantiaca</i>                   |
| 132 | Basidiomycota | Agaricomycetes  | Corticiales       | Corticaceae         | <i>Limonomyces</i>        | <i>Limonomyces culmigenus</i>               |
| 133 | Ascomycota    | Saccharomycetes | Saccharomycetales | Debaryomycetaceae   | <i>Candida</i>            | <i>Candida orthopsilosis</i>                |
| 134 | Ascomycota    | Dothideomycetes | Pleosporales      | Didymellaceae       | <i>Boeremia</i>           | <i>Boeremia exigua</i>                      |
| 135 | Ascomycota    | Dothideomycetes | NA                | NA                  | NA                        | Dothideomycetes sp. CCFEE 5764              |
| 136 | Ascomycota    | Dothideomycetes | Pleosporales      | NA                  | NA                        | Pleosporales sp. JP215                      |
| 137 | Ascomycota    | Dothideomycetes | Pleosporales      | Sporormiaceae       | <i>Preussia</i>           | <i>Preussia</i> sp. JJP-2009a               |
| 138 | Ascomycota    | Eurotiomycetes  | Eurotiales        | Aspergillaceae      | <i>Aspergillus</i>        | <i>Aspergillus</i> sp. MU-2009-1            |
| 139 | NA            | NA              | NA                | NA                  | NA                        | fungal endophyte sp. JP56                   |
| 140 | Ascomycota    | Dothideomycetes | Capnodiales       | Mycosphaerellaceae  | <i>Neomycosphaerella</i>  | <i>Neomycosphaerella pseudopentameridis</i> |
| 141 | Ascomycota    | Dothideomycetes | Capnodiales       | Cladosporiaceae     | <i>Toxicocladosporium</i> | <i>Toxicocladosporium banksiae</i>          |
| 142 | Ascomycota    | Dothideomycetes | Capnodiales       | Mycosphaerellaceae  | <i>Septoria</i>           | cf. <i>Septoria</i> sp. CBS 134910          |
| 143 | Ascomycota    | Eurotiomycetes  | Eurotiales        | Aspergillaceae      | <i>Aspergillus</i>        | <i>Aspergillus</i> sp. XF7                  |
| 144 | Ascomycota    | Dothideomycetes | Capnodiales       | Mycosphaerellaceae  | <i>Passalora</i>          | cf. <i>Passalora</i> sp. CPC 11876          |
| 145 | Ascomycota    | Dothideomycetes | Capnodiales       | Teratosphaeriaceae  | <i>Xenoconiothyrium</i>   | <i>Xenoconiothyrium catenata</i>            |
| 146 | Ascomycota    | Dothideomycetes | Pleosporales      | NA                  | NA                        | Pleosporales sp. 1 TMS-2011                 |
| 147 | Ascomycota    | NA              | NA                | NA                  | NA                        | Ascomycota sp. I306                         |
| 148 | Ascomycota    | Dothideomycetes | Capnodiales       | Cladosporiaceae     | <i>Cladosporium</i>       | <i>Cladosporium dominicanum</i>             |
| 149 | Basidiomycota | Tremellomycetes | Tremellales       | NA                  | <i>Cryptococcus</i>       | <i>Cryptococcus cuniculi</i>                |
| 150 | Ascomycota    | NA              | NA                | NA                  | NA                        | ascomycete sp. Vega379                      |
| 151 | Ascomycota    | Dothideomycetes | Capnodiales       | Mycosphaerellaceae  | <i>Passalora</i>          | <i>Passalora ageratinae</i>                 |
| 152 | Ascomycota    | Dothideomycetes | Capnodiales       | Teratosphaeriaceae  | <i>Capnobotryella</i>     | <i>Capnobotryella</i> sp. MA 4766           |
| 153 | Ascomycota    | Eurotiomycetes  | Chaetothyriales   | Herpotrichiellaceae | <i>Cladophialophora</i>   | <i>Cladophialophora parmeliae</i>           |
| 154 | Ascomycota    | Dothideomycetes | Capnodiales       | Cladosporiaceae     | <i>Cladosporium</i>       | <i>Cladosporium cladosporioides</i>         |

| OTU | phylum        | class              | order             | family             | genus                    | species                                |
|-----|---------------|--------------------|-------------------|--------------------|--------------------------|----------------------------------------|
| 155 | Ascomycota    | Dothideomycetes    | Pleosporales      | Phaeosphaeriaceae  | <i>Phaeosphaeria</i>     | cf. <i>Phaeosphaeria</i> sp. CPC 12130 |
| 156 | Ascomycota    | NA                 | NA                | NA                 | NA                       | melanized limestone ascomycete CR-2004 |
| 157 | Ascomycota    | Dothideomycetes    | Pleosporales      | Phaeosphaeriaceae  | <i>Phaeosphaeria</i>     | <i>Phaeosphaeria podocarpi</i>         |
| 158 | Ascomycota    | Dothideomycetes    | Pleosporales      | Pleosporaceae      | <i>Alternaria</i>        | <i>Alternaria alternata</i>            |
| 159 | Ascomycota    | Pezizomycetes      | Pezizales         | Sarcosomataceae    | NA                       | Sarcosomataceae sp. GSL4_2_3           |
| 160 | Ascomycota    | Dothideomycetes    | NA                | NA                 | NA                       | Dothideomycetes sp. TMS-2011           |
| 161 | Ascomycota    | Leotiomycetes      | Helotiales        | Helotiaceae        | <i>Idriella</i>          | <i>Idriella cubensis</i>               |
| 162 | Ascomycota    | Dothideomycetes    | Capnodiales       | Cladosporiaceae    | <i>Rachicladosporium</i> | <i>Rachicladosporium pini</i>          |
| 163 | NA            | NA                 | NA                | NA                 | NA                       | NA                                     |
| 164 | Ascomycota    | Dothideomycetes    | Pleosporales      | Sporormiaceae      | <i>Preussia</i>          | <i>Preussia</i> sp. PPV3.6             |
| 165 | Ascomycota    | NA                 | NA                | NA                 | <i>Acremonium</i>        | <i>Acremonium</i> sp. CBS 115996       |
| 166 | Ascomycota    | Sordariomycetes    | Hypocreales       | NA                 | <i>Eucasphaeria</i>      | <i>Eucasphaeria capensis</i>           |
| 167 | NA            | NA                 | NA                | NA                 | NA                       | fungus sp. TF7MSG                      |
| 168 | Ascomycota    | Dothideomycetes    | Capnodiales       | Mycosphaerellaceae | <i>Septoria</i>          | cf. <i>Septoria</i> sp. CPC 19311      |
| 169 | Ascomycota    | Dothideomycetes    | Capnodiales       | NA                 | NA                       | Capnodiales sp. BN-Lon33-1             |
| 170 | Ascomycota    | NA                 | NA                | NA                 | NA                       | melanized limestone ascomycete CR-2004 |
| 171 | Ascomycota    | Dothideomycetes    | Capnodiales       | Cladosporiaceae    | <i>Rachicladosporium</i> | <i>Rachicladosporium pini</i>          |
| 172 | Ascomycota    | NA                 | NA                | NA                 | <i>Acremonium</i>        | <i>Acremonium</i> sp. CBS 115996       |
| 173 | Ascomycota    | Sordariomycetes    | Hypocreales       | Nectriaceae        | <i>Nectria</i>           | <i>Nectria nigrescens</i>              |
| 174 | NA            | NA                 | NA                | NA                 | NA                       | fungus sp. ARIZ AZ1016                 |
| 175 | Ascomycota    | Eurotiomycetes     | Eurotiales        | Thermoascaceae     | <i>Byssochlamys</i>      | <i>Byssochlamys spectabilis</i>        |
| 176 | Ascomycota    | Sordariomycetes    | Diaporthales      | Diaporthaceae      | <i>Diaporthe</i>         | <i>Diaporthe anacardii</i>             |
| 177 | Basidiomycota | Microbotryomycetes | NA                | NA                 | <i>Rhodotorula</i>       | <i>Rhodotorula hylophila</i>           |
| 178 | Ascomycota    | Sordariomycetes    | Trichosphaeriales | Trichosphaeriaceae | <i>Nigrospora</i>        | <i>Nigrospora sphaerica</i>            |
| 179 | Ascomycota    | Dothideomycetes    | Capnodiales       | Teratosphaeriaceae | <i>Capnobotryella</i>    | <i>Capnobotryella</i> sp. MA 4615      |
| 180 | Basidiomycota | Tremellomycetes    | Tremellales       | Sirobasidiaceae    | <i>Fibulobasidium</i>    | <i>Fibulobasidium murrhardtense</i>    |
| 181 | Ascomycota    | Sordariomycetes    | Hypocreales       | NA                 | <i>Eucasphaeria</i>      | <i>Eucasphaeria capensis</i>           |
| 182 | Ascomycota    | Dothideomycetes    | Capnodiales       | Teratosphaeriaceae | <i>Devriesia</i>         | <i>Devriesia</i> sp. GSH2_8            |
| 183 | NA            | NA                 | NA                | NA                 | NA                       | fungus sp. TRN213                      |
| 184 | Ascomycota    | Dothideomycetes    | Pleosporales      | Didymosphaeriaceae | <i>Paraphaeosphaeria</i> | <i>Paraphaeosphaeria michotii</i>      |
| 185 | NA            | NA                 | NA                | NA                 | NA                       | fungus sp. D9                          |
| 186 | Basidiomycota | Tremellomycetes    | Tremellales       | NA                 | <i>Cryptococcus</i>      | <i>Cryptococcus</i> sp. LH42           |

| OTU | phylum        | class           | order             | family             | genus                     | species                                  |
|-----|---------------|-----------------|-------------------|--------------------|---------------------------|------------------------------------------|
| 187 | Ascomycota    | Dothideomycetes | Capnodiales       | Mycosphaerellaceae | <i>Parapenidiella</i>     | <i>Parapenidiella pseudotasmaniensis</i> |
| 188 | NA            | NA              | NA                | NA                 | NA                        | fungal sp. OCMK                          |
| 189 | Ascomycota    | Dothideomycetes | Pleosporales      | Lentitheciaceae    | <i>Keissleriella</i>      | <i>Keissleriella poagena</i>             |
| 190 | Ascomycota    | Saccharomycetes | Saccharomycetales | Debaryomycetaceae  | <i>Candida</i>            | <i>Candida parapsilosis</i>              |
| 191 | Ascomycota    | Sordariomycetes | Xylariales        | Amphisphaeriaceae  | <i>Pestalotiopsis</i>     | <i>Pestalotiopsis</i> sp. F105           |
| 192 | Ascomycota    | Leotiomycetes   | Helotiales        | Rutstroemiaceae    | <i>Lambertella</i>        | <i>Lambertella corni-maris</i>           |
| 193 | Basidiomycota | Tremellomycetes | Tremellales       | NA                 | <i>Cryptococcus</i>       | <i>Cryptococcus cuniculi</i>             |
| 194 | Ascomycota    | Eurotiomycetes  | Eurotiales        | Aspergillaceae     | <i>Aspergillus</i>        | <i>Aspergillus</i> sp. JS1081            |
| 195 | Ascomycota    | Saccharomycetes | Saccharomycetales | Debaryomycetaceae  | <i>Candida</i>            | <i>Candida orthopsilosis</i>             |
| 196 | Ascomycota    | Saccharomycetes | Saccharomycetales | Debaryomycetaceae  | <i>Candida</i>            | <i>Candida orthopsilosis</i>             |
| 197 | NA            | NA              | NA                | NA                 | NA                        | fungal sp. DGUMF01                       |
| 198 | Ascomycota    | Dothideomycetes | Pleosporales      | Didymellaceae      | <i>Peyronellaea</i>       | <i>Peyronellaea glomerata</i>            |
| 199 | Ascomycota    | Sordariomycetes | Sordariales       | Sordariaceae       | <i>Sordaria</i>           | <i>Sordaria fimicola</i>                 |
| 200 | NA            | NA              | NA                | NA                 | NA                        | fungal sp. TRN449                        |
| 201 | Ascomycota    | Dothideomycetes | Botryosphaeriales | NA                 | NA                        | Botryosphaeriales sp. 2 IP-2014          |
| 202 | NA            | NA              | NA                | NA                 | NA                        | fungal endophyte                         |
| 203 | Ascomycota    | Eurotiomycetes  | Eurotiales        | Aspergillaceae     | <i>Aspergillus</i>        | <i>Aspergillus</i> sp. JS1081            |
| 204 | Ascomycota    | Dothideomycetes | Botryosphaeriales | Aplosporellaceae   | <i>Aplosporella</i>       | <i>Aplosporella hesperidica</i>          |
| 205 | Basidiomycota | Tremellomycetes | Tremellales       | NA                 | <i>Kockovaella</i>        | <i>Kockovaella barringtoniae</i>         |
| 206 | Basidiomycota | Tremellomycetes | Tremellales       | Tremellaceae       | <i>Tremella</i>           | <i>Tremella microspora</i>               |
| 207 | Ascomycota    | Dothideomycetes | Capnodiales       | Mycosphaerellaceae | <i>Mycosphaerella</i>     | <i>Mycosphaerella</i> sp. PDD 105250     |
| 208 | Basidiomycota | Tremellomycetes | Tremellales       | Sirobasidiaceae    | <i>Fibulobasidium</i>     | <i>Fibulobasidium inconspicuum</i>       |
| 209 | Basidiomycota | Tremellomycetes | Tremellales       | NA                 | <i>Cryptococcus</i>       | <i>Cryptococcus dimennae</i>             |
| 210 | NA            | NA              | NA                | NA                 | NA                        | fungal endophyte                         |
| 211 | Ascomycota    | NA              | NA                | NA                 | NA                        | Ascomycota sp. MUT 4376                  |
| 212 | Ascomycota    | Dothideomycetes | NA                | NA                 | NA                        | Dothideomycetes sp. MX339                |
| 213 | Ascomycota    | Sordariomycetes | Hypocreales       | Nectriaceae        | NA                        | Nectriaceae sp. G.J.S. 96-216            |
| 214 | NA            | NA              | NA                | NA                 | NA                        | fungal sp. SNB-CN72                      |
| 215 | Ascomycota    | Dothideomycetes | Capnodiales       | Mycosphaerellaceae | <i>Paramycosphaerella</i> | <i>Paramycosphaerella brachystegia</i>   |
| 216 | NA            | NA              | NA                | NA                 | NA                        | fungal endophyte sp. SX01                |
| 217 | Ascomycota    | Dothideomycetes | Capnodiales       | Teratosphaeriaceae | <i>Devriesia</i>          | <i>Devriesia</i> sp. GSH2_8              |
| 218 | Ascomycota    | Dothideomycetes | Pleosporales      | Pleosporaceae      | <i>Alternaria</i>         | <i>Alternaria porri</i>                  |

| OTU | phylum        | class             | order             | family              | genus                     | species                                          |
|-----|---------------|-------------------|-------------------|---------------------|---------------------------|--------------------------------------------------|
| 219 | NA            | NA                | NA                | NA                  | NA                        | fungal endophyte                                 |
| 220 | Ascomycota    | Dothideomycetes   | Capnodiales       | NA                  | <i>Penidiella</i>         | <i>Penidiella aggregata</i>                      |
| 221 | NA            | NA                | NA                | NA                  | NA                        | fungal endophyte                                 |
| 222 | Ascomycota    | Dothideomycetes   | Pleosporales      | Corynesporascaceae  | <i>Corynespora</i>        | <i>Corynespora citricola</i>                     |
| 223 | Ascomycota    | Dothideomycetes   | Pleosporales      | Didymellaceae       | <i>Leptosphaerulina</i>   | <i>Leptosphaerulina</i> cf. <i>chartarum</i> 72C |
| 224 | Basidiomycota | Tremellomycetes   | Tremellales       | NA                  | <i>Cryptococcus</i>       | <i>Cryptococcus dimennae</i>                     |
| 225 | Ascomycota    | Dothideomycetes   | Pleosporales      | Didymellaceae       | <i>Phoma</i>              | <i>Phoma</i> sp. FL-2014b                        |
| 226 | NA            | NA                | NA                | NA                  | NA                        | fungal endophyte                                 |
| 227 | Ascomycota    | Sordariomycetes   | Hypocreales       | NA                  | <i>Eucasphaeria</i>       | <i>Eucasphaeria capensis</i>                     |
| 228 | Ascomycota    | Dothideomycetes   | Capnodiales       | Teratosphaeriaceae  | <i>Xenoteratosphaeria</i> | <i>Xenoteratosphaeria jonkershoekensis</i>       |
| 229 | Ascomycota    | Dothideomycetes   | Botryosphaeriales | Botryosphaeriaceae  | <i>Microdiplodia</i>      | <i>Microdiplodia</i> sp. EOL1_2                  |
| 230 | Ascomycota    | Dothideomycetes   | Capnodiales       | Mycosphaerellaceae  | <i>Passalora</i>          | cf. <i>Passalora</i> sp. CPC 11876               |
| 231 | Ascomycota    | NA                | NA                | NA                  | NA                        | ascomycete sp. Vega451                           |
| 232 | NA            | NA                | NA                | NA                  | NA                        | fungal endophyte                                 |
| 233 | Ascomycota    | Sordariomycetes   | Hypocreales       | Bionectriaceae      | NA                        | Bionectriaceae sp. MS64                          |
| 234 | Ascomycota    | Lecanoromycetes   | Lecanorales       | Ramalinaceae        | <i>Biatora</i>            | <i>Biatora helvola</i>                           |
| 235 | Ascomycota    | Dothideomycetes   | Pleosporales      | Didymellaceae       | <i>Phoma</i>              | <i>Phoma proteae</i>                             |
| 236 | Ascomycota    | NA                | NA                | NA                  | <i>Acremonium</i>         | <i>Acremonium charticola</i>                     |
| 237 | Basidiomycota | Tremellomycetes   | Tremellales       | NA                  | NA                        | Tremellales sp. OTU_001                          |
| 238 | Basidiomycota | Exobasidiomycetes | Microstromatales  | Quambalariaceae     | <i>Quambalaria</i>        | <i>Quambalaria cyanescens</i>                    |
| 239 | Ascomycota    | Dothideomycetes   | Capnodiales       | Cladosporiaceae     | <i>Toxicocladosporium</i> | <i>Toxicocladosporium veloxum</i>                |
| 240 | Ascomycota    | Dothideomycetes   | Pleosporales      | Pleosporaceae       | <i>Curvularia</i>         | <i>Curvularia lunata</i>                         |
| 241 | Ascomycota    | Dothideomycetes   | Pleosporales      | NA                  | <i>Zeloasperisporium</i>  | <i>Zeloasperisporium eucalyptorum</i>            |
| 242 | Ascomycota    | Eurotiomycetes    | Chaetothyriales   | Cyphellophoraceae   | <i>Cyphellophora</i>      | <i>Cyphellophora eucalypti</i>                   |
| 243 | Ascomycota    | NA                | NA                | NA                  | NA                        | ascomycete sp. nasa25                            |
| 244 | Ascomycota    | Dothideomycetes   | Pleosporales      | Didymellaceae       | <i>Leptosphaerulina</i>   | <i>Leptosphaerulina</i> sp. Vega582              |
| 245 | NA            | NA                | NA                | NA                  | NA                        | fungal endophyte                                 |
| 246 | Basidiomycota | Tremellomycetes   | Tremellales       | NA                  | <i>Dioszegia</i>          | <i>Dioszegia hungarica</i>                       |
| 247 | Ascomycota    | Eurotiomycetes    | Chaetothyriales   | Herpotrichiellaceae | <i>Rhinocladiella</i>     | <i>Rhinocladiella</i> sp. MA 4765                |
| 248 | Ascomycota    | NA                | NA                | NA                  | <i>Acremonium</i>         | <i>Acremonium charticola</i>                     |
| 249 | NA            | NA                | NA                | NA                  | NA                        | fungal sp. TRN213                                |
| 250 | Basidiomycota | Tremellomycetes   | Tremellales       | NA                  | <i>Cryptococcus</i>       | <i>Cryptococcus mangaliensis</i>                 |



| OTU | phylum        | class           | order             | family             | genus                     | species                                          |
|-----|---------------|-----------------|-------------------|--------------------|---------------------------|--------------------------------------------------|
| 251 | Ascomycota    | Dothideomycetes | Pleosporales      | Didymellaceae      | <i>Phoma</i>              | <i>Phoma</i> sp. F37                             |
| 252 | Ascomycota    | Sordariomycetes | Xylariales        | Diatrypaceae       | <i>Cryptosphaeria</i>     | <i>Cryptosphaeria subcutanea</i>                 |
| 253 | Ascomycota    | Dothideomycetes | Capnodiales       | Cladosporiaceae    | <i>Cladosporium</i>       | <i>Cladosporium cladosporioides</i>              |
| 254 | Ascomycota    | Sordariomycetes | Hypocreales       | Nectriaceae        | <i>Fusarium</i>           | <i>Fusarium proliferatum</i>                     |
| 255 | Ascomycota    | Dothideomycetes | NA                | NA                 | NA                        | Dothideomycetes sp. genotype 252                 |
| 256 | Ascomycota    | Dothideomycetes | Capnodiales       | Teratosphaeriaceae | <i>Xenoteratosphaeria</i> | <i>Xenoteratosphaeria jonkershoekensis</i>       |
| 257 | Ascomycota    | Sordariomycetes | Hypocreales       | Nectriaceae        | <i>Geejayessia</i>        | <i>Geejayessia desmazieri</i>                    |
| 258 | Ascomycota    | Dothideomycetes | Pleosporales      | NA                 | NA                        | Pleosporales sp. MUT 4417                        |
| 259 | Basidiomycota | Tremellomycetes | Tremellales       | NA                 | <i>Bullera</i>            | <i>Bullera</i> sp. TMS-2011                      |
| 260 | Ascomycota    | Dothideomycetes | Capnodiales       | Cladosporiaceae    | <i>Cladosporium</i>       | <i>Cladosporium herbarum</i>                     |
| 261 | Ascomycota    | NA              | NA                | NA                 | <i>Acremonium</i>         | <i>Acremonium</i> sp. CBS 115996                 |
| 262 | Ascomycota    | NA              | NA                | NA                 | <i>Acremonium</i>         | <i>Acremonium citrinum</i>                       |
| 263 | Ascomycota    | Dothideomycetes | Capnodiales       | Mycosphaerellaceae | <i>Phaeophleospora</i>    | <i>Phaeophleospora</i> sp. PDD 105481            |
| 264 | Ascomycota    | Sordariomycetes | Hypocreales       | Nectriaceae        | <i>Fusarium</i>           | <i>Fusarium brevicatenuatum</i>                  |
| 265 | Ascomycota    | Saccharomycetes | Saccharomycetales | Debaryomycetaceae  | <i>Candida</i>            | <i>Candida orthopsilosis</i>                     |
| 266 | Ascomycota    | Dothideomycetes | Capnodiales       | Mycosphaerellaceae | <i>Amycosphaerella</i>    | <i>Amycosphaerella africana</i>                  |
| 267 | Ascomycota    | NA              | NA                | NA                 | <i>Phaeotheca</i>         | <i>Phaeotheca triangularis</i>                   |
| 268 | Ascomycota    | Dothideomycetes | Capnodiales       | Dissoconiaceae     | <i>Ramichloridium</i>     | <i>Ramichloridium eucleae</i>                    |
| 269 | NA            | NA              | NA                | NA                 | NA                        | fungal sp. TRN449                                |
| 270 | Ascomycota    | Saccharomycetes | Saccharomycetales | Phaffomycetaceae   | <i>Wickerhamomyces</i>    | <i>Wickerhamomyces edaphicus</i>                 |
| 271 | Ascomycota    | Dothideomycetes | Capnodiales       | Cladosporiaceae    | <i>Rachicladosporium</i>  | <i>Rachicladosporium alpinum</i>                 |
| 272 | Ascomycota    | Dothideomycetes | Capnodiales       | Cladosporiaceae    | <i>Cladosporium</i>       | <i>Cladosporium sphaerospermum</i>               |
| 273 | Ascomycota    | Dothideomycetes | Capnodiales       | Cladosporiaceae    | <i>Rachicladosporium</i>  | <i>Rachicladosporium cboliae</i>                 |
| 274 | Basidiomycota | Tremellomycetes | Tremellales       | NA                 | <i>Dioszegia</i>          | <i>Dioszegia</i> sp. CBS 11711                   |
| 275 | Ascomycota    | Dothideomycetes | NA                | NA                 | NA                        | Dothideomycetes sp. 11361                        |
| 276 | Ascomycota    | Sordariomycetes | Trichosphaeriales | Trichosphaeriaceae | <i>Nigrospora</i>         | <i>Nigrospora</i> sp. BSM2_6                     |
| 277 | Ascomycota    | Dothideomycetes | Capnodiales       | Teratosphaeriaceae | <i>Teratosphaeria</i>     | <i>Teratosphaeria</i> sp. CPC 13963              |
| 278 | Ascomycota    | NA              | NA                | NA                 | NA                        | ascomycete sp. 6/97-53                           |
| 279 | Ascomycota    | Sordariomycetes | Hypocreales       | Bionectriaceae     | NA                        | Bionectriaceae sp. MS64                          |
| 280 | NA            | NA              | NA                | NA                 | NA                        | NA                                               |
| 281 | Ascomycota    | Dothideomycetes | Pleosporales      | Didymellaceae      | <i>Leptosphaerulina</i>   | <i>Leptosphaerulina</i> cf. <i>chartarum</i> 72C |
| 282 | Ascomycota    | Dothideomycetes | Capnodiales       | Cladosporiaceae    | <i>Rachicladosporium</i>  | <i>Rachicladosporium americanum</i>              |

| OTU | phylum        | class               | order             | family             | genus                   | species                              |
|-----|---------------|---------------------|-------------------|--------------------|-------------------------|--------------------------------------|
| 283 | Ascomycota    | Dothideomycetes     | Pleosporales      | NA                 | NA                      | Pleosporales sp. ICMP 18095          |
| 284 | Ascomycota    | Sordariomycetes     | Hypocreales       | NA                 | <i>Sarocladium</i>      | <i>Sarocladium strictum</i>          |
| 285 | Ascomycota    | Dothideomycetes     | Capnodiales       | Mycosphaerellaceae | <i>Trimmatostroma</i>   | <i>Trimmatostroma salinum</i>        |
| 286 | Ascomycota    | Saccharomycetes     | Saccharomycetales | Debaryomycetaceae  | <i>Candida</i>          | <i>Candida parapsilosis</i>          |
| 287 | Basidiomycota | Cystobasidiomycetes | Erythrobasidiales | Erythrobasidiaceae | <i>Rhodotorula</i>      | <i>Rhodotorula armeniaca</i>         |
| 288 | Basidiomycota | Tremellomycetes     | Tremellales       | NA                 | <i>Cryptococcus</i>     | <i>Cryptococcus</i> sp. CBS 12710    |
| 289 | Ascomycota    | NA                  | NA                | NA                 | NA                      | Ascomycota sp. AR-2010               |
| 290 | Ascomycota    | Sordariomycetes     | Xylariales        | Amphisphaeriaceae  | <i>Bartalinia</i>       | <i>Bartalinia pondoensis</i>         |
| 291 | Basidiomycota | Tremellomycetes     | Filobasidiales    | NA                 | <i>Cryptococcus</i>     | <i>Cryptococcus magnus</i>           |
| 292 | Ascomycota    | Eurotiomycetes      | Eurotiales        | Aspergillaceae     | <i>Penicillium</i>      | <i>Penicillium</i> sp. 7-28          |
| 293 | Ascomycota    | Dothideomycetes     | Capnodiales       | Cladosporiaceae    | <i>Cladosporium</i>     | <i>Cladosporium herbarum</i>         |
| 294 | Ascomycota    | Eurotiomycetes      | Chaetothyriales   | Cyphellophoraceae  | <i>Cyphellophora</i>    | <i>Cyphellophora europaea</i>        |
| 295 | Basidiomycota | Microbotryomycetes  | Sporidiobolales   | NA                 | <i>Rhodotorula</i>      | <i>Rhodotorula</i> sp. JZB2120003    |
| 296 | Ascomycota    | Sordariomycetes     | Xylariales        | Amphisphaeriaceae  | <i>Discosia</i>         | <i>Discosia pseudoartocreas</i>      |
| 297 | Basidiomycota | Tremellomycetes     | Tremellales       | Tremellaceae       | NA                      | Tremellaceae sp. TMS-2011            |
| 298 | Ascomycota    | Dothideomycetes     | Capnodiales       | Cladosporiaceae    | <i>Cladosporium</i>     | <i>Cladosporium psychrotolerans</i>  |
| 299 | Ascomycota    | Dothideomycetes     | Capnodiales       | Teratosphaeriaceae | <i>Teratosphaeria</i>   | <i>Teratosphaeria capensis</i>       |
| 300 | Ascomycota    | NA                  | NA                | NA                 | <i>Scolecobasidium</i>  | <i>Scolecobasidium</i> sp. HLS212    |
| 301 | Ascomycota    | NA                  | NA                | NA                 | NA                      | Ascomycota sp. agrAR196              |
| 302 | Ascomycota    | NA                  | NA                | NA                 | <i>Pseudotaeniolina</i> | <i>Pseudotaeniolina globosa</i>      |
| 303 | Ascomycota    | Dothideomycetes     | Capnodiales       | Mycosphaerellaceae | <i>Acervuloseptoria</i> | <i>Acervuloseptoria ziziphicola</i>  |
| 304 | Ascomycota    | Leotiomycetes       | Helotiales        | NA                 | <i>Hyalodendriella</i>  | <i>Hyalodendriella</i> sp. FN-4-S1-1 |
| 305 | Ascomycota    | Sordariomycetes     | Hypocreales       | Nectriaceae        | <i>Fusarium</i>         | <i>Fusarium</i> sp. NRRL 13444       |
| 306 | Ascomycota    | Dothideomycetes     | Pleosporales      | Phaeosphaeriaceae  | <i>Phaeosphaeria</i>    | <i>Stagonospora arenaria</i>         |
| 307 | Basidiomycota | Microbotryomycetes  | Sporidiobolales   | NA                 | NA                      | Sporidiobolales sp. G5               |
| 308 | Ascomycota    | Sordariomycetes     | Diaporthales      | Valsaceae          | <i>Cytospora</i>        | <i>Cytospora</i> sp. Po83            |
| 309 | Ascomycota    | Dothideomycetes     | Capnodiales       | Mycosphaerellaceae | <i>Staninwardia</i>     | <i>Staninwardia suttonii</i>         |
| 310 | Ascomycota    | Sordariomycetes     | Xylariales        | Amphisphaeriaceae  | <i>Pestalotiopsis</i>   | <i>Pestalotiopsis</i> sp. HC02       |
| 311 | Basidiomycota | Tremellomycetes     | Tremellales       | NA                 | <i>Dioszegia</i>        | <i>Dioszegia hungarica</i>           |
| 312 | Ascomycota    | Eurotiomycetes      | Eurotiales        | Aspergillaceae     | <i>Penicillium</i>      | <i>Penicillium spinulosum</i>        |
| 313 | Basidiomycota | Tremellomycetes     | Tremellales       | NA                 | <i>Dioszegia</i>        | <i>Dioszegia zsolttii</i>            |
| 314 | Ascomycota    | Sordariomycetes     | Hypocreales       | Bionectriaceae     | NA                      | Bionectriaceae sp. MS64              |

| OTU | phylum        | class                | order             | family             | genus                   | species                              |
|-----|---------------|----------------------|-------------------|--------------------|-------------------------|--------------------------------------|
| 315 | Ascomycota    | NA                   | NA                | NA                 | NA                      | Ascomycota sp. FL-2010a              |
| 316 | NA            | NA                   | NA                | NA                 | NA                      | fungal sp. TRN213                    |
| 317 | Ascomycota    | Dothideomycetes      | Pleosporales      | Cucurbitariaceae   | <i>Pyrenochaeta</i>     | <i>Pyrenochaeta lycopersici</i>      |
| 318 | Ascomycota    | Eurotiomycetes       | Onygenales        | Eremascaceae       | <i>Eremascus</i>        | <i>Eremascus albus</i>               |
| 319 | Ascomycota    | Dothideomycetes      | Capnodiales       | Teratosphaeriaceae | <i>Xenoconiothyrium</i> | <i>Xenoconiothyrium catenata</i>     |
| 320 | Basidiomycota | Agaricostilbomycetes | NA                | NA                 | <i>Bensingtonia</i>     | <i>Bensingtonia subrosea</i>         |
| 321 | Ascomycota    | Sordariomycetes      | Hypocreales       | NA                 | <i>Eucasphaeria</i>     | <i>Eucasphaeria capensis</i>         |
| 322 | Ascomycota    | NA                   | NA                | NA                 | <i>Acremonium</i>       | <i>Acremonium charticola</i>         |
| 323 | Ascomycota    | Dothideomycetes      | Capnodiales       | Cladosporiaceae    | <i>Cladosporium</i>     | <i>Cladosporium macrocarpum</i>      |
| 324 | Ascomycota    | Dothideomycetes      | Pleosporales      | Didymosphaeriaceae | <i>Montagnula</i>       | <i>Montagnula</i> sp. MFLUCC 11-0576 |
| 325 | Ascomycota    | Sordariomycetes      | Microascales      | Halosphaeriaceae   | <i>Periconia</i>        | <i>Periconia macrospinoso</i>        |
| 326 | Ascomycota    | Lecanoromycetes      | Acarosporales     | Acarosporaceae     | <i>Pleopsidium</i>      | <i>Pleopsidium gobiense</i>          |
| 327 | Ascomycota    | Dothideomycetes      | Pleosporales      | Pleosporaceae      | <i>Alternaria</i>       | <i>Alternaria alternata</i>          |
| 328 | Ascomycota    | Sordariomycetes      | Diaporthales      | NA                 | <i>Diatractium</i>      | <i>Diatractium cordianum</i>         |
| 329 | NA            | NA                   | NA                | NA                 | NA                      | fungal endophyte                     |
| 330 | NA            | NA                   | NA                | NA                 | NA                      | fungal sp. TRN213                    |
| 331 | Basidiomycota | Cystobasidiomycetes  | Erythrobasidiales | Erythrobasidiaceae | <i>Sporobolomyces</i>   | <i>Sporobolomyces yunnanensis</i>    |
| 332 | Ascomycota    | Dothideomycetes      | Capnodiales       | Mycosphaerellaceae | <i>Staninwardia</i>     | <i>Staninwardia suttonii</i>         |
| 333 | Ascomycota    | Saccharomycetes      | Saccharomycetales | Debaryomycetaceae  | <i>Candida</i>          | <i>Candida tropicalis</i>            |
| 334 | Ascomycota    | Dothideomycetes      | Capnodiales       | Cladosporiaceae    | <i>Cladosporium</i>     | <i>Cladosporium</i> sp. FA-A2        |
| 335 | Basidiomycota | Tremellomycetes      | Tremellales       | NA                 | <i>Cryptococcus</i>     | <i>Cryptococcus</i> sp. SJ8L03       |
| 336 | Ascomycota    | NA                   | NA                | NA                 | NA                      | Ascomycota sp. ARIZ OCMAN1-13        |
| 337 | Ascomycota    | Sordariomycetes      | Hypocreales       | Clavicipitaceae    | <i>Claviceps</i>        | <i>Claviceps</i> sp. ICMP 16980      |
| 338 | Ascomycota    | Eurotiomycetes       | Chaetothyriales   | Chaetothyriaceae   | NA                      | Chaetothyriaceae sp. UFMGCB 5878     |
| 339 | Ascomycota    | Dothideomycetes      | Capnodiales       | Teratosphaeriaceae | <i>Devriesia</i>        | <i>Devriesia modesta</i>             |
| 340 | Ascomycota    | Dothideomycetes      | Dothideales       | Dothideaceae       | <i>Endoconidioma</i>    | <i>Endoconidioma populi</i>          |
| 341 | Basidiomycota | Cystobasidiomycetes  | Erythrobasidiales | Erythrobasidiaceae | <i>Sporobolomyces</i>   | <i>Sporobolomyces vermiculatus</i>   |
| 342 | NA            | NA                   | NA                | NA                 | NA                      | fungal sp. TRN235                    |
| 343 | Ascomycota    | Dothideomycetes      | Capnodiales       | Mycosphaerellaceae | <i>Phaeothecoidea</i>   | <i>Phaeothecoidea intermedia</i>     |
| 344 | Ascomycota    | Dothideomycetes      | Pleosporales      | NA                 | NA                      | Pleosporales sp. 3 TMS-2011          |
| 345 | Ascomycota    | Lecanoromycetes      | Lecanorales       | Ramalinaceae       | <i>Biatora</i>          | <i>Biatora helvola</i>               |
| 346 | NA            | NA                   | NA                | NA                 | NA                      | fungal sp. mh1129.6                  |

| OTU | phylum        | class               | order             | family             | genus                     | species                                     |
|-----|---------------|---------------------|-------------------|--------------------|---------------------------|---------------------------------------------|
| 347 | NA            | NA                  | NA                | NA                 | NA                        | fungal sp. BOER-OM-2C                       |
| 348 | Ascomycota    | Sordariomycetes     | Diaporthales      | Valsaceae          | <i>Phomopsis</i>          | <i>Phomopsis</i> sp. ISPaVe ERKV310         |
| 349 | Ascomycota    | Dothideomycetes     | Pleosporales      | Phaeosphaeriaceae  | <i>Phaeosphaeriopsis</i>  | <i>Phaeosphaeriopsis</i> sp. MBP17A         |
| 350 | Ascomycota    | Dothideomycetes     | Capnodiales       | Mycosphaerellaceae | <i>Neomycosphaerella</i>  | <i>Neomycosphaerella pseudopentameridis</i> |
| 351 | Ascomycota    | Dothideomycetes     | Capnodiales       | Teratosphaeriaceae | <i>Devriesia</i>          | <i>Devriesia lagerstroemiae</i>             |
| 352 | Ascomycota    | Sordariomycetes     | Microascales      | Halosphaeriaceae   | <i>Periconia</i>          | <i>Periconia</i> sp. SFL3_1                 |
| 353 | Ascomycota    | Sordariomycetes     | Trichosphaeriales | Trichosphaeriaceae | <i>Nigrospora</i>         | <i>Nigrospora</i> sp. BSM2_6                |
| 354 | Basidiomycota | Tremellomycetes     | Tremellales       | NA                 | <i>Cryptococcus</i>       | <i>Cryptococcus dimennae</i>                |
| 355 | Ascomycota    | Dothideomycetes     | Pleosporales      | Phaeosphaeriaceae  | <i>Phaeosphaeria</i>      | <i>Phaeosphaeria poagena</i>                |
| 356 | Ascomycota    | Dothideomycetes     | NA                | NA                 | <i>Epicoccum</i>          | <i>Epicoccum nigrum</i>                     |
| 357 | Ascomycota    | Eurotiomycetes      | Eurotiales        | Aspergillaceae     | <i>Aspergillus</i>        | <i>Aspergillus</i> sp. 11A_co2              |
| 358 | Ascomycota    | Sordariomycetes     | Hypocreales       | Clavicipitaceae    | <i>Claviceps</i>          | <i>Claviceps</i> sp. ICMP 16980             |
| 359 | Ascomycota    | Dothideomycetes     | Myriangiales      | Elsinoaceae        | <i>Elsinoe</i>            | <i>Elsinoe fawcettii</i>                    |
| 360 | Ascomycota    | Lecanoromycetes     | Ostropales        | NA                 | NA                        | Ostropales sp. s056                         |
| 361 | Ascomycota    | Dothideomycetes     | Pleosporales      | Didymellaceae      | <i>Peyronellaea</i>       | <i>Peyronellaea curtisii</i>                |
| 362 | Ascomycota    | Dothideomycetes     | Capnodiales       | Mycosphaerellaceae | <i>Mycosphaerella</i>     | <i>Mycosphaerella</i> sp. 2 SAP152          |
| 363 | Ascomycota    | Eurotiomycetes      | Eurotiales        | Aspergillaceae     | <i>Penicillium</i>        | <i>Penicillium cinnamopurpureum</i>         |
| 364 | Ascomycota    | Sordariomycetes     | Coniochaetales    | Coniochaetaceae    | <i>Coniochaeta</i>        | <i>Lecythophora</i> sp. YP363               |
| 365 | Ascomycota    | Sordariomycetes     | Hypocreales       | NA                 | <i>Sarocladium</i>        | <i>Sarocladium strictum</i>                 |
| 366 | Ascomycota    | Lecanoromycetes     | Rhizocarpaceae    | Rhizocarpaceae     | <i>Rhizocarpon</i>        | <i>Rhizocarpon lavatum</i>                  |
| 367 | Ascomycota    | Lecanoromycetes     | Lecanorales       | Lecanoraceae       | <i>Lecidella</i>          | <i>Lecidella carpathica</i>                 |
| 368 | Ascomycota    | NA                  | NA                | NA                 | NA                        | Pezizomycotina sp. PAH2_7                   |
| 369 | NA            | NA                  | NA                | NA                 | NA                        | fungal endophyte                            |
| 370 | NA            | NA                  | NA                | NA                 | NA                        | fungal sp. APA-2013                         |
| 371 | Ascomycota    | Dothideomycetes     | Myriangiales      | Elsinoaceae        | NA                        | Elsinoaceae sp. ZLY-2010b                   |
| 372 | Ascomycota    | Dothideomycetes     | NA                | NA                 | <i>Sclerostagonospora</i> | <i>Sclerostagonospora</i> sp. CBS 118224    |
| 373 | Ascomycota    | Dothideomycetes     | Capnodiales       | Cladosporiaceae    | <i>Cladosporium</i>       | <i>Cladosporium grevilleae</i>              |
| 374 | Basidiomycota | Exobasidiomycetes   | NA                | NA                 | NA                        | Exobasidiomycetidae sp. IBL 03150           |
| 375 | Basidiomycota | Tremellomycetes     | Tremellales       | NA                 | <i>Cryptococcus</i>       | <i>Cryptococcus flavescens</i>              |
| 376 | Basidiomycota | Cystobasidiomycetes | Erythrobasidiales | Erythrobasidiaceae | <i>Erythrobasidium</i>    | <i>Erythrobasidium</i> sp. FF-2011          |
| 377 | Ascomycota    | Dothideomycetes     | Capnodiales       | Cladosporiaceae    | <i>Toxicocladosporium</i> | <i>Toxicocladosporium ficiniae</i>          |
| 378 | Ascomycota    | Dothideomycetes     | Dothideales       | NA                 | NA                        | Dothideales sp. P44C001                     |

| OTU | phylum        | class               | order               | family               | genus                     | species                                    |
|-----|---------------|---------------------|---------------------|----------------------|---------------------------|--------------------------------------------|
| 379 | Basidiomycota | Tremellomycetes     | Cystofilobasidiales | Cystofilobasidiaceae | <i>Mrakiella</i>          | <i>Mrakiella aquatica</i>                  |
| 380 | Basidiomycota | Tremellomycetes     | Tremellales         | NA                   | <i>Cryptococcus</i>       | <i>Cryptococcus armeniacus</i>             |
| 381 | Ascomycota    | NA                  | NA                  | NA                   | NA                        | melanized limestone ascomycete CR-2004     |
| 382 | Ascomycota    | Sordariomycetes     | Hypocreales         | Nectriaceae          | <i>Cosmospora</i>         | <i>Cosmospora stegonsporii</i>             |
| 383 | Basidiomycota | Tremellomycetes     | Tremellales         | NA                   | <i>Dioszegia</i>          | <i>Dioszegia zsoltii</i>                   |
| 384 | Ascomycota    | Leotiomycetes       | Erysiphales         | Erysiphaceae         | <i>Erysiphe</i>           | <i>Erysiphe</i> sp. <i>Quercus</i> 2010    |
| 385 | Ascomycota    | NA                  | NA                  | NA                   | <i>Bahusakala</i>         | <i>Bahusakala australiensis</i>            |
| 386 | Ascomycota    | Dothideomycetes     | Pleosporales        | Didymellaceae        | <i>Phoma</i>              | <i>Phoma</i> sp. 27AT1704                  |
| 387 | Ascomycota    | Sordariomycetes     | Glomerellales       | Glomerellaceae       | <i>Colletotrichum</i>     | <i>Colletotrichum karstii</i>              |
| 388 | Ascomycota    | Dothideomycetes     | Capnodiales         | Teratosphaeriaceae   | <i>Xenoteratosphaeria</i> | <i>Xenoteratosphaeria jonkershoekensis</i> |
| 389 | Ascomycota    | Sordariomycetes     | Xylariales          | Xylariaceae          | <i>Anthostomella</i>      | <i>Anthostomella</i> sp. CMT29             |
| 390 | Ascomycota    | NA                  | NA                  | NA                   | NA                        | salal root associated fungus UBCtra180     |
| 391 | Ascomycota    | Eurotiomycetes      | Eurotiales          | Aspergillaceae       | <i>Penicillium</i>        | <i>Penicillium</i> sp. PSF36               |
| 392 | Ascomycota    | Dothideomycetes     | Pleosporales        | NA                   | NA                        | Pleosporales sp. PSU-ES146                 |
| 393 | Basidiomycota | Tremellomycetes     | Tremellales         | NA                   | <i>Bullera</i>            | <i>Bullera dendrophila</i>                 |
| 394 | Ascomycota    | Sordariomycetes     | Hypocreales         | Nectriaceae          | <i>Fusarium</i>           | <i>Fusarium</i> sp. MI 17                  |
| 395 | Ascomycota    | NA                  | NA                  | NA                   | NA                        | Ascomycota sp. AR-2010                     |
| 396 | Ascomycota    | Dothideomycetes     | Capnodiales         | Teratosphaeriaceae   | <i>Devriesia</i>          | <i>Devriesia xanthorrhoeae</i>             |
| 397 | Ascomycota    | Eurotiomycetes      | Eurotiales          | Aspergillaceae       | <i>Aspergillus</i>        | <i>Aspergillus ochraceus</i>               |
| 398 | Ascomycota    | Saccharomycetes     | Saccharomycetales   | Debaryomycetaceae    | <i>Candida</i>            | <i>Candida orthopsilosis</i>               |
| 399 | Ascomycota    | Sordariomycetes     | Hypocreales         | Bionectriaceae       | NA                        | Bionectriaceae sp. MS64                    |
| 400 | Ascomycota    | Eurotiomycetes      | Eurotiales          | Aspergillaceae       | <i>Aspergillus</i>        | <i>Aspergillus versicolor</i>              |
| 401 | Basidiomycota | Cystobasidiomycetes | Erythrobasidiales   | Erythrobasidiaceae   | <i>Rhodotorula</i>        | <i>Rhodotorula aurantiaca</i>              |
| 402 | Ascomycota    | Sordariomycetes     | Hypocreales         | Clavicipitaceae      | <i>Claviceps</i>          | <i>Claviceps</i> sp. ICMP 16980            |
| 403 | Ascomycota    | Sordariomycetes     | Hypocreales         | Nectriaceae          | <i>Gliocephalotrichum</i> | <i>Gliocephalotrichum bulbilium</i>        |
| 404 | Ascomycota    | Eurotiomycetes      | Eurotiales          | Aspergillaceae       | <i>Aspergillus</i>        | <i>Aspergillus</i> sp. JS1081              |
| 405 | Ascomycota    | Dothideomycetes     | Pleosporales        | Pleosporaceae        | <i>Bipolaris</i>          | <i>Bipolaris</i> sp. 2 TMS-2011            |
| 406 | Ascomycota    | Dothideomycetes     | Capnodiales         | Mycosphaerellaceae   | <i>Staninwardia</i>       | <i>Staninwardia suttonii</i>               |
| 407 | Ascomycota    | Saccharomycetes     | Saccharomycetales   | Debaryomycetaceae    | <i>Candida</i>            | <i>Candida orthopsilosis</i>               |
| 408 | Ascomycota    | Lecanoromycetes     | Ostropales          | Stictidaceae         | <i>Cryptodiscus</i>       | <i>Cryptodiscus pini</i>                   |
| 409 | NA            | NA                  | NA                  | NA                   | NA                        | fungal sp. E-000535746                     |
| 410 | NA            | NA                  | NA                  | NA                   | NA                        | fungal sp. R19                             |

| OTU | phylum        | class           | order           | family              | genus                     | species                                              |
|-----|---------------|-----------------|-----------------|---------------------|---------------------------|------------------------------------------------------|
| 411 | Ascomycota    | Sordariomycetes | Hypocreales     | Bionectriaceae      | NA                        | Bionectriaceae sp. MS64                              |
| 412 | Ascomycota    | Eurotiomycetes  | Chaetothyriales | Herpotrichiellaceae | <i>Exophiala</i>          | <i>Exophiala crusticola</i>                          |
| 413 | Ascomycota    | Dothideomycetes | Pleosporales    | Pleosporaceae       | NA                        | Pleosporaceae sp. LH40                               |
| 414 | Ascomycota    | NA              | NA              | NA                  | <i>Acremonium</i>         | <i>Acremonium citrinum</i>                           |
| 415 | Basidiomycota | Tremellomycetes | Tremellales     | NA                  | <i>Cryptococcus</i>       | <i>Cryptococcus dimenmae</i>                         |
| 416 | Ascomycota    | Dothideomycetes | Capnodiales     | Mycosphaerellaceae  | <i>Trimmatostroma</i>     | <i>Trimmatostroma</i> sp. MT658                      |
| 417 | Ascomycota    | Leotiomycetes   | Helotiales      | Helotiaceae         | <i>Idriella</i>           | <i>Idriella ramosa</i>                               |
| 418 | Ascomycota    | Dothideomycetes | Capnodiales     | Cladosporiaceae     | <i>Cladosporium</i>       | <i>Cladosporium exasperatum</i>                      |
| 419 | Ascomycota    | Dothideomycetes | Pleosporales    | Massarinaceae       | <i>Stagonospora</i>       | <i>Stagonospora</i> sp. C2/13                        |
| 420 | Basidiomycota | Agaricomycetes  | Polyporales     | Coriolaceae         | <i>Trametes</i>           | <i>Trametes versicolor</i>                           |
| 421 | Ascomycota    | NA              | NA              | NA                  | <i>Acremonium</i>         | <i>Acremonium</i> sp. CBS 115996                     |
| 422 | NA            | NA              | NA              | NA                  | NA                        | fungal endophyte sp. ECD-2008                        |
| 423 | Basidiomycota | Tremellomycetes | Tremellales     | NA                  | <i>Cryptococcus</i>       | <i>Cryptococcus nemorosus</i>                        |
| 424 | Basidiomycota | Tremellomycetes | Tremellales     | NA                  | <i>Cryptococcus</i>       | <i>Cryptococcus</i> aff. <i>amylolyticus</i> IP-2014 |
| 425 | Ascomycota    | Sordariomycetes | Xylariales      | Amphisphaeriaceae   | <i>Pestalotiopsis</i>     | <i>Pestalotiopsis hawaiiensis</i>                    |
| 426 | Ascomycota    | Dothideomycetes | Capnodiales     | Mycosphaerellaceae  | <i>Sonderhenia</i>        | <i>Sonderhenia eucalypticola</i>                     |
| 427 | Ascomycota    | Dothideomycetes | Capnodiales     | Teratosphaeriaceae  | <i>Devriesia</i>          | <i>Devriesia agapanthi</i>                           |
| 428 | Ascomycota    | Eurotiomycetes  | Chaetothyriales | NA                  | NA                        | Chaetothyriales sp. MACM1                            |
| 429 | Ascomycota    | Dothideomycetes | Capnodiales     | Cladosporiaceae     | <i>Toxicocladosporium</i> | <i>Toxicocladosporium banksiae</i>                   |
| 430 | Ascomycota    | NA              | NA              | NA                  | NA                        | Ascomycota sp. MG106                                 |
| 431 | Ascomycota    | Dothideomycetes | Capnodiales     | Cladosporiaceae     | <i>Cladosporium</i>       | <i>Cladosporium aphidis</i>                          |
| 432 | Ascomycota    | Dothideomycetes | Capnodiales     | Teratosphaeriaceae  | <i>Devriesia</i>          | <i>Devriesia</i> sp. GSH2_8                          |
| 433 | NA            | NA              | NA              | NA                  | NA                        | fungal endophyte sp. CZ9                             |
| 434 | NA            | NA              | NA              | NA                  | NA                        | fungal endophyte                                     |
| 435 | NA            | NA              | NA              | NA                  | NA                        | fungal sp. ARIZ L365                                 |
| 436 | Ascomycota    | Sordariomycetes | Hypocreales     | NA                  | <i>Acremonium</i>         | <i>Acremonium acutatum</i>                           |
| 437 | NA            | NA              | NA              | NA                  | NA                        | fungal endophyte                                     |
| 438 | NA            | NA              | NA              | NA                  | NA                        | fungal endophyte                                     |
| 439 | Ascomycota    | Dothideomycetes | Capnodiales     | Teratosphaeriaceae  | <i>Xenoteratosphaeria</i> | <i>Xenoteratosphaeria jonkershoekensis</i>           |
| 440 | NA            | NA              | NA              | NA                  | NA                        | fungal endophyte                                     |
| 441 | Ascomycota    | Dothideomycetes | Pleosporales    | Pleosporaceae       | <i>Cochliobolus</i>       | <i>Cochliobolus</i> sp. P18E2                        |
| 442 | NA            | NA              | NA              | NA                  | NA                        | fungal endophyte                                     |

| OTU | phylum        | class             | order             | family             | genus                     | species                               |
|-----|---------------|-------------------|-------------------|--------------------|---------------------------|---------------------------------------|
| 443 | Ascomycota    | Sordariomycetes   | Xylariales        | Apiosporaceae      | <i>Arthrimum</i>          | <i>Arthrimum</i> sp. MJ32             |
| 444 | Ascomycota    | Sordariomycetes   | Hypocreales       | Bionectriaceae     | NA                        | Bionectriaceae sp. MS64               |
| 445 | Basidiomycota | Tremellomycetes   | Tremellales       | NA                 | <i>Cryptococcus</i>       | <i>Cryptococcus</i> sp. CBS 8358      |
| 446 | Ascomycota    | Leotiomycetes     | Erysiphales       | Erysiphaceae       | <i>Golovinomyces</i>      | <i>Golovinomyces sonchicola</i>       |
| 447 | Ascomycota    | Dothideomycetes   | Pleosporales      | Pleosporaceae      | <i>Alternaria</i>         | <i>Alternaria infectoria</i>          |
| 448 | Ascomycota    | Dothideomycetes   | Capnodiales       | Cladosporiaceae    | <i>Cladosporium</i>       | <i>Cladosporium cladosporioides</i>   |
| 449 | Ascomycota    | Dothideomycetes   | Capnodiales       | Teratosphaeriaceae | <i>Devriesia</i>          | <i>Devriesia</i> sp. GSH2_8           |
| 450 | Ascomycota    | Sordariomycetes   | Hypocreales       | NA                 | <i>Acremonium</i>         | <i>Acremonium acutatum</i>            |
| 451 | Ascomycota    | Dothideomycetes   | Pleosporales      | Phaeosphaeriaceae  | <i>Phaeosphaeria</i>      | <i>Phaeosphaeria podocarpi</i>        |
| 452 | Ascomycota    | Dothideomycetes   | Capnodiales       | Cladosporiaceae    | <i>Toxicocladosporium</i> | <i>Toxicocladosporium strelitziae</i> |
| 453 | Ascomycota    | Dothideomycetes   | Capnodiales       | NA                 | <i>Racodium</i>           | <i>Racodium rupestre</i>              |
| 454 | Ascomycota    | Sordariomycetes   | Xylariales        | Amphisphaeriaceae  | <i>Pestalotiopsis</i>     | <i>Pestalotiopsis</i> sp. D97_300B    |
| 455 | Ascomycota    | NA                | NA                | NA                 | NA                        | Ascomycota sp. AR-2010                |
| 456 | NA            | NA                | NA                | NA                 | NA                        | fungal endophyte                      |
| 457 | Ascomycota    | Dothideomycetes   | Dothideales       | Dothioraceae       | <i>Pringsheimia</i>       | <i>Pringsheimia euphorbiae</i>        |
| 458 | Basidiomycota | Tremellomycetes   | Tremellales       | NA                 | <i>Cryptococcus</i>       | <i>Cryptococcus dimennae</i>          |
| 459 | Ascomycota    | NA                | NA                | NA                 | <i>Radulidium</i>         | <i>Radulidium subulatum</i>           |
| 460 | Ascomycota    | Dothideomycetes   | Pleosporales      | Phaeosphaeriaceae  | <i>Phaeosphaeria</i>      | <i>Phaeosphaeria pontiformis</i>      |
| 461 | Ascomycota    | Dothideomycetes   | Myriangiales      | Elsinoaceae        | NA                        | Elsinoaceae sp. ZLY-2010b             |
| 462 | Ascomycota    | Dothideomycetes   | Capnodiales       | Cladosporiaceae    | <i>Cladosporium</i>       | <i>Cladosporium chubutense</i>        |
| 463 | Ascomycota    | NA                | NA                | NA                 | NA                        | Ascomycota sp. I364                   |
| 464 | Ascomycota    | Sordariomycetes   | Hypocreales       | Nectriaceae        | <i>Fusarium</i>           | <i>Fusarium oxysporum</i>             |
| 465 | Basidiomycota | Ustilaginomycetes | Ustilaginales     | Ustilaginaceae     | <i>Pseudozyma</i>         | <i>Pseudozyma</i> sp. LCF-11          |
| 466 | Basidiomycota | Tremellomycetes   | Tremellales       | Tremellaceae       | <i>Papiliotrema</i>       | <i>Papiliotrema bandonii</i>          |
| 467 | Basidiomycota | Tremellomycetes   | Tremellales       | NA                 | <i>Cryptococcus</i>       | <i>Cryptococcus</i> sp. CBS 12710     |
| 468 | Basidiomycota | Agaricomycetes    | Russulales        | Peniophoraceae     | <i>Peniophora</i>         | <i>Peniophora incarnata</i>           |
| 469 | Ascomycota    | Sordariomycetes   | Xylariales        | Apiosporaceae      | <i>Arthrimum</i>          | <i>Arthrimum phaeospermum</i>         |
| 470 | NA            | NA                | NA                | NA                 | NA                        | fungal sp. FF-2011                    |
| 471 | Ascomycota    | NA                | NA                | NA                 | NA                        | Ascomycota sp. SB16                   |
| 472 | Ascomycota    | Dothideomycetes   | Pleosporales      | Pleosporaceae      | <i>Curvularia</i>         | <i>Curvularia subpapendorffii</i>     |
| 473 | Ascomycota    | Saccharomycetes   | Saccharomycetales | Metschnikowiaceae  | <i>Clavispora</i>         | <i>Candida haemulonis</i>             |
| 474 | Ascomycota    | Lecanoromycetes   | Ostropales        | Graphidaceae       | <i>Diploschistes</i>      | <i>Diploschistes cinereocaesius</i>   |

| OTU | phylum        | class             | order             | family             | genus                 | species                              |
|-----|---------------|-------------------|-------------------|--------------------|-----------------------|--------------------------------------|
| 475 | Ascomycota    | Sordariomycetes   | Hypocreales       | NA                 | <i>Myrothecium</i>    | <i>Myrothecium gramineum</i>         |
| 476 | Basidiomycota | Agaricomycetes    | Russulales        | Peniophoraceae     | <i>Peniophora</i>     | <i>Peniophora</i> sp. TW06-13        |
| 477 | NA            | NA                | NA                | NA                 | NA                    | fungal sp. E15410A                   |
| 478 | Basidiomycota | Malasseziomycetes | Malasseziales     | Malasseziaceae     | <i>Malassezia</i>     | <i>Malassezia restricta</i>          |
| 479 | Ascomycota    | Sordariomycetes   | Microascales      | Halosphaeriaceae   | <i>Periconia</i>      | <i>Periconia</i> sp. CY191           |
| 480 | Ascomycota    | Dothideomycetes   | NA                | NA                 | <i>Epicoccum</i>      | <i>Epicoccum nigrum</i>              |
| 481 | NA            | NA                | NA                | NA                 | NA                    | fungal endophyte                     |
| 482 | Ascomycota    | Dothideomycetes   | Pleosporales      | Leptosphaeriaceae  | <i>Sphaerellopsis</i> | <i>Sphaerellopsis paraphysata</i>    |
| 483 | Ascomycota    | Sordariomycetes   | Xylariales        | Xylariaceae        | <i>Xylaria</i>        | <i>Xylaria acuminatilongissima</i>   |
| 484 | Basidiomycota | Exobasidiomycetes | Exobasidiales     | Exobasidiaceae     | <i>Exobasidium</i>    | <i>Exobasidium japonicum</i>         |
| 485 | Ascomycota    | Dothideomycetes   | Capnodiales       | Mycosphaerellaceae | <i>Passalora</i>      | cf. <i>Passalora</i> sp. CPC 11876   |
| 486 | Ascomycota    | Dothideomycetes   | NA                | NA                 | NA                    | Dothideomycetes sp. 11361            |
| 487 | Ascomycota    | Sordariomycetes   | NA                | NA                 | <i>Thyronectria</i>   | <i>Thyronectria roseovirens</i>      |
| 488 | Ascomycota    | NA                | NA                | NA                 | NA                    | Ascomycota sp. AR-2010               |
| 489 | Ascomycota    | Saccharomycetes   | Saccharomycetales | Debaryomycetaceae  | <i>Yamadazyma</i>     | <i>Candida endomychidarum</i>        |
| 490 | Basidiomycota | Tremellomycetes   | NA                | NA                 | <i>Cryptococcus</i>   | <i>Cryptococcus</i> sp. 1 TMS-2011   |
| 491 | Ascomycota    | Dothideomycetes   | Capnodiales       | Dissoconiaceae     | <i>Dissoconium</i>    | <i>Dissoconium eucalypti</i>         |
| 492 | Ascomycota    | Sordariomycetes   | Hypocreales       | NA                 | NA                    | Hypocreales sp. IBL 03124            |
| 493 | Ascomycota    | Dothideomycetes   | Capnodiales       | Cladosporiaceae    | <i>Cladosporium</i>   | <i>Cladosporium sphaerospermum</i>   |
| 494 | Ascomycota    | Dothideomycetes   | Capnodiales       | Mycosphaerellaceae | <i>Cercospora</i>     | <i>Cercospora mikaniicola</i>        |
| 495 | NA            | NA                | NA                | NA                 | NA                    | fungal endophyte                     |
| 496 | Ascomycota    | Dothideomycetes   | Pleosporales      | Phaeosphaeriaceae  | <i>Phaeosphaeria</i>  | <i>Phaeosphaeria triglochinicola</i> |
| 497 | Ascomycota    | Dothideomycetes   | Pleosporales      | Pleosporaceae      | <i>Curvularia</i>     | <i>Curvularia geniculata</i>         |
| 498 | Ascomycota    | Sordariomycetes   | Hypocreales       | Nectriaceae        | <i>Fusarium</i>       | <i>Fusarium brevicatenuatum</i>      |
| 499 | Ascomycota    | Dothideomycetes   | Capnodiales       | Teratosphaeriaceae | <i>Catenulostroma</i> | <i>Catenulostroma hermanusense</i>   |
| 500 | Basidiomycota | Tremellomycetes   | Tremellales       | NA                 | <i>Cryptococcus</i>   | <i>Cryptococcus</i> sp. CBS 12710    |
| 501 | Ascomycota    | Sordariomycetes   | Xylariales        | Apiosporaceae      | <i>Arthrimum</i>      | <i>Arthrimum</i> sp. LH11            |
| 502 | Ascomycota    | Dothideomycetes   | Capnodiales       | Mycosphaerellaceae | <i>Septoria</i>       | <i>Septoria</i> sp. CBS 120739       |
| 503 | Ascomycota    | Sordariomycetes   | Xylariales        | NA                 | NA                    | Xylariales sp. VegaE1-52             |
| 504 | Basidiomycota | Tremellomycetes   | Tremellales       | NA                 | <i>Cryptococcus</i>   | <i>Cryptococcus</i> sp. FMR 9074     |
| 505 | Ascomycota    | Eurotiomycetes    | Eurotiales        | Aspergillaceae     | <i>Penicillium</i>    | <i>Penicillium olsonii</i>           |
| 506 | Ascomycota    | Dothideomycetes   | Capnodiales       | Teratosphaeriaceae | <i>Devriesia</i>      | <i>Devriesia lagerstroemiae</i>      |



| OTU | phylum        | class               | order             | family             | genus                 | species                                            |
|-----|---------------|---------------------|-------------------|--------------------|-----------------------|----------------------------------------------------|
| 507 | NA            | NA                  | NA                | NA                 | NA                    | fungal sp. EXP0526F                                |
| 508 | Basidiomycota | Tremellomycetes     | Tremellales       | NA                 | <i>Cryptococcus</i>   | <i>Cryptococcus cuniculi</i>                       |
| 509 | Ascomycota    | Dothideomycetes     | Myriangiales      | NA                 | <i>Endosporium</i>    | <i>Endosporium aviarium</i>                        |
| 510 | Basidiomycota | Cystobasidiomycetes | Erythrobasidiales | Erythrobasidiaceae | <i>Rhodotorula</i>    | <i>Rhodotorula</i> sp. JCM8162                     |
| 511 | Ascomycota    | NA                  | NA                | NA                 | NA                    | Ascomycota sp. AR-2010                             |
| 512 | NA            | NA                  | NA                | NA                 | NA                    | fungal sp. ARIZ L118                               |
| 513 | Ascomycota    | Sordariomycetes     | Hypocreales       | NA                 | <i>Sarocladium</i>    | <i>Sarocladium strictum</i>                        |
| 514 | Ascomycota    | Dothideomycetes     | Dothideales       | Aureobasidiaceae   | <i>Aureobasidium</i>  | <i>Aureobasidium</i> sp. PPV3_5                    |
| 515 | Ascomycota    | Sordariomycetes     | Glomerellales     | Glomerellaceae     | <i>Colletotrichum</i> | <i>Colletotrichum siamense</i>                     |
| 516 | Ascomycota    | Dothideomycetes     | Capnodiales       | Cladosporiaceae    | <i>Cladosporium</i>   | <i>Cladosporium chubutense</i>                     |
| 517 | Ascomycota    | Dothideomycetes     | Pleosporales      | Pleosporaceae      | <i>Alternaria</i>     | <i>Alternaria crassa</i>                           |
| 518 | Ascomycota    | Dothideomycetes     | Capnodiales       | Teratosphaeriaceae | <i>Austroafricana</i> | <i>Austroafricana parva</i>                        |
| 519 | NA            | NA                  | NA                | NA                 | NA                    | fungal endophyte                                   |
| 520 | Ascomycota    | Sordariomycetes     | Hypocreales       | Nectriaceae        | <i>Cosmospora</i>     | <i>Cosmospora cupularis</i>                        |
| 521 | Basidiomycota | Microbotryomycetes  | Sporidiobolales   | NA                 | <i>Rhodotorula</i>    | <i>Rhodotorula glutinis</i>                        |
| 522 | Ascomycota    | Dothideomycetes     | Capnodiales       | Mycosphaerellaceae | <i>Mycosphaerella</i> | <i>Mycosphaerella</i> sp. KH00254                  |
| 523 | Basidiomycota | Tremellomycetes     | Tremellales       | NA                 | <i>Cryptococcus</i>   | <i>Cryptococcus</i> sp. CBS 8979                   |
| 524 | Ascomycota    | Dothideomycetes     | Pleosporales      | Pleosporaceae      | <i>Alternaria</i>     | <i>Alternaria alternata</i>                        |
| 525 | Ascomycota    | Dothideomycetes     | NA                | NA                 | NA                    | Dothideomycetes sp. genotype 276                   |
| 526 | Ascomycota    | Dothideomycetes     | Pleosporales      | Pleosporaceae      | <i>Curvularia</i>     | <i>Curvularia brachyspora</i>                      |
| 527 | NA            | NA                  | NA                | NA                 | NA                    | fungal endophyte                                   |
| 528 | Ascomycota    | NA                  | NA                | NA                 | <i>Acremonium</i>     | <i>Acremonium fusidioides</i>                      |
| 529 | Ascomycota    | Sordariomycetes     | Diaporthales      | Diaporthaceae      | <i>Diaporthe</i>      | <i>Diaporthe parapterocarpi</i>                    |
| 530 | Ascomycota    | NA                  | NA                | NA                 | NA                    | Ascomycota sp. E86141                              |
| 531 | Ascomycota    | Sordariomycetes     | Hypocreales       | NA                 | <i>Sarocladium</i>    | <i>Sarocladium strictum</i>                        |
| 532 | Basidiomycota | Cystobasidiomycetes | Erythrobasidiales | Erythrobasidiaceae | <i>Rhodotorula</i>    | <i>Rhodotorula</i> aff. <i>marina</i> IMUFRJ 52025 |
| 533 | Ascomycota    | Sordariomycetes     | Hypocreales       | Nectriaceae        | <i>Fusarium</i>       | <i>Fusarium sporotrichioides</i>                   |
| 534 | NA            | NA                  | NA                | NA                 | NA                    | fungal sp. TF7MSG                                  |
| 535 | Ascomycota    | Dothideomycetes     | Dothideales       | Aureobasidiaceae   | <i>Kabatiella</i>     | <i>Kabatiella caulivora</i>                        |
| 536 | Ascomycota    | Eurotiomycetes      | Chaetothyriales   | NA                 | <i>Strelitziana</i>   | <i>Strelitziana africana</i>                       |
| 537 | NA            | NA                  | NA                | NA                 | NA                    | fungal sp. TF7MSG                                  |
| 538 | Ascomycota    | Dothideomycetes     | Capnodiales       | Mycosphaerellaceae | <i>Mycosphaerella</i> | <i>Mycosphaerella</i> sp. 2 SAP154                 |

| OTU | phylum        | class               | order              | family               | genus                     | species                                  |
|-----|---------------|---------------------|--------------------|----------------------|---------------------------|------------------------------------------|
| 539 | Ascomycota    | Dothideomycetes     | Pleosporales       | Phaeosphaeriaceae    | <i>Phaeosphaeria</i>      | <i>Phaeosphaeria</i> sp. JP-2013         |
| 540 | Basidiomycota | Cystobasidiomycetes | Erythrobasidiales  | Erythrobasidiaceae   | <i>Sporobolomyces</i>     | <i>Sporobolomyces oryzicola</i>          |
| 541 | Ascomycota    | NA                  | NA                 | NA                   | <i>Acremonium</i>         | <i>Acremonium</i> sp. CBS 115996         |
| 542 | Ascomycota    | Sordariomycetes     | Magnaporthales     | Magnaporthaceae      | <i>Pyricularia</i>        | <i>Pyricularia parasitica</i>            |
| 543 | Ascomycota    | Dothideomycetes     | Pleosporales       | Didymosphaeriaceae   | <i>Paraphaeosphaeria</i>  | <i>Paraphaeosphaeria</i> sp. MDC2_5      |
| 544 | Ascomycota    | Dothideomycetes     | Pleosporales       | Didymellaceae        | <i>Leptosphaerulina</i>   | <i>Leptosphaerulina</i> sp. BF19         |
| 545 | Ascomycota    | Dothideomycetes     | Capnodiales        | Teratosphaeriaceae   | <i>Devriesia</i>          | <i>Devriesia lagerstroemiae</i>          |
| 546 | Ascomycota    | Eurotiomycetes      | Phaeomoniellales   | NA                   | <i>Phaeomoniella</i>      | <i>Phaeomoniella</i> sp. 2 ICMP 18934    |
| 547 | Ascomycota    | Sordariomycetes     | Hypocreales        | NA                   | <i>Acremonium</i>         | <i>Acremonium acutatum</i>               |
| 548 | Ascomycota    | NA                  | NA                 | NA                   | NA                        | salal root associated fungus UBCtra180   |
| 549 | Ascomycota    | Dothideomycetes     | Capnodiales        | Cladosporiaceae      | <i>Cladosporium</i>       | <i>Cladosporium cladosporioides</i>      |
| 550 | Ascomycota    | Dothideomycetes     | NA                 | NA                   | <i>Epicoccum</i>          | <i>Epicoccum</i> sp. UFMGCB 4570         |
| 551 | Basidiomycota | Tremellomycetes     | Filobasidiales     | NA                   | <i>Cryptococcus</i>       | <i>Cryptococcus</i> sp. BC26             |
| 552 | NA            | NA                  | NA                 | NA                   | NA                        | NA                                       |
| 553 | Ascomycota    | Dothideomycetes     | NA                 | NA                   | <i>Sclerostagonospora</i> | <i>Sclerostagonospora</i> sp. CBS 118152 |
| 554 | Ascomycota    | Lecanoromycetes     | Lecanorales        | Ramalinaceae         | <i>Biatora</i>            | <i>Biatora kodiakensis</i>               |
| 555 | Basidiomycota | Tremellomycetes     | Tremellales        | NA                   | <i>Cryptococcus</i>       | <i>Cryptococcus</i> sp. LH42             |
| 556 | Ascomycota    | Arthoniomycetes     | Lichenostigmatales | Phaeococcomycetaceae | <i>Phaeococcomyces</i>    | <i>Phaeococcomyces nigricans</i>         |
| 557 | Ascomycota    | Dothideomycetes     | Pleosporales       | Pleosporaceae        | <i>Alternaria</i>         | <i>Alternaria brassicicola</i>           |
| 558 | Ascomycota    | Eurotiomycetes      | Eurotiales         | Aspergillaceae       | <i>Penicillium</i>        | <i>Penicillium</i> sp. 19 BRO-2013       |
| 559 | Ascomycota    | Eurotiomycetes      | Eurotiales         | Thermoascaceae       | <i>Byssochlamys</i>       | <i>Byssochlamys spectabilis</i>          |
| 560 | NA            | NA                  | NA                 | NA                   | NA                        | fungus sp. TRN213                        |
| 561 | Ascomycota    | Eurotiomycetes      | Eurotiales         | Aspergillaceae       | <i>Penicillium</i>        | <i>Penicillium</i> sp. CID1245           |
| 562 | Basidiomycota | Tremellomycetes     | Tremellales        | NA                   | <i>Cryptococcus</i>       | <i>Cryptococcus</i> sp. DMKU-CP250       |
| 563 | Basidiomycota | Tremellomycetes     | Tremellales        | NA                   | <i>Cryptococcus</i>       | <i>Cryptococcus dimennae</i>             |
| 564 | Basidiomycota | Tremellomycetes     | Tremellales        | NA                   | <i>Fellomyces</i>         | <i>Fellomyces</i> sp. CBS 8310           |
| 565 | Ascomycota    | Dothideomycetes     | Capnodiales        | Dissoconiaceae       | <i>Dissoconium</i>        | <i>Dissoconium</i> sp. GS-2011           |
| 566 | Ascomycota    | Dothideomycetes     | Pleosporales       | Phaeosphaeriaceae    | <i>Parastagonospora</i>   | <i>Parastagonospora avenae</i>           |
| 567 | Ascomycota    | Dothideomycetes     | Capnodiales        | Teratosphaeriaceae   | <i>Devriesia</i>          | <i>Devriesia</i> sp. GSH2_8              |
| 568 | Ascomycota    | Dothideomycetes     | Capnodiales        | Neodevriesiaceae     | NA                        | Neodevriesiaceae sp. CCFEE 5569          |
| 569 | Ascomycota    | Dothideomycetes     | NA                 | NA                   | <i>Sclerostagonospora</i> | <i>Sclerostagonospora</i> sp. CBS 118152 |
| 570 | Basidiomycota | Tremellomycetes     | Tremellales        | NA                   | <i>Cryptococcus</i>       | <i>Cryptococcus</i> sp. CBS 12710        |

| OTU | phylum        | class           | order              | family               | genus                     | species                                  |
|-----|---------------|-----------------|--------------------|----------------------|---------------------------|------------------------------------------|
| 571 | Ascomycota    | Arthoniomycetes | Lichenostigmatales | Phaeococcomycetaceae | <i>Phaeococcomyces</i>    | <i>Phaeococcomyces eucalypti</i>         |
| 572 | Ascomycota    | NA              | NA                 | NA                   | NA                        | Ascomycota sp. G47                       |
| 573 | Ascomycota    | Dothideomycetes | Capnodiales        | Cladosporiaceae      | <i>Cladosporium</i>       | <i>Cladosporium</i> sp. 181UFPR          |
| 574 | Ascomycota    | Dothideomycetes | Capnodiales        | Teratosphaeriaceae   | <i>Teratosphaericola</i>  | <i>Teratosphaericola pseudafricana</i>   |
| 575 | Basidiomycota | Agaricomycetes  | Agaricales         | Marasmiaceae         | <i>Crinipellis</i>        | <i>Crinipellis furcata</i>               |
| 576 | NA            | NA              | NA                 | NA                   | NA                        | fungal sp. Sen007                        |
| 577 | Ascomycota    | Dothideomycetes | Tubeufiales        | Tubeufiaceae         | <i>Thaxteriella</i>       | <i>Thaxteriella inthanonensis</i>        |
| 578 | Ascomycota    | Sordariomycetes | Hypocreales        | NA                   | <i>Eucasphaeria</i>       | <i>Eucasphaeria capensis</i>             |
| 579 | NA            | NA              | NA                 | NA                   | NA                        | fungal endophyte                         |
| 580 | Ascomycota    | Leotiomycetes   | Helotiales         | Helotiaceae          | <i>Articulospora</i>      | <i>Articulospora proliferata</i>         |
| 581 | NA            | NA              | NA                 | NA                   | NA                        | fungal endophyte                         |
| 582 | NA            | NA              | NA                 | NA                   | NA                        | fungal sp. TF7MSG                        |
| 583 | Ascomycota    | Sordariomycetes | Hypocreales        | NA                   | <i>Sarocladium</i>        | <i>Sarocladium strictum</i>              |
| 584 | Basidiomycota | Tremellomycetes | Tremellales        | NA                   | <i>Cryptococcus</i>       | <i>Cryptococcus podzolicus</i>           |
| 585 | Ascomycota    | Dothideomycetes | NA                 | NA                   | NA                        | Dothideomycetes sp. 11361                |
| 586 | Ascomycota    | Leotiomycetes   | Helotiales         | Sclerotiniaceae      | NA                        | Sclerotiniaceae sp. PDD 89105            |
| 587 | Ascomycota    | NA              | NA                 | NA                   | NA                        | Ascomycota sp. AR-2010                   |
| 588 | Ascomycota    | Dothideomycetes | Pleosporales       | Phaeosphaeriaceae    | <i>Parastagonospora</i>   | <i>Parastagonospora avenae</i>           |
| 589 | Ascomycota    | Sordariomycetes | Hypocreales        | Nectriaceae          | <i>Fusarium</i>           | <i>Fusarium</i> sp. MI 17                |
| 590 | NA            | NA              | NA                 | NA                   | NA                        | fungal endophyte                         |
| 591 | Ascomycota    | Dothideomycetes | Pleosporales       | Pleosporaceae        | <i>Bipolaris</i>          | <i>Bipolaris cynodontis</i>              |
| 592 | Ascomycota    | Arthoniomycetes | Lichenostigmatales | Phaeococcomycetaceae | <i>Phaeococcomyces</i>    | <i>Phaeococcomyces eucalypti</i>         |
| 593 | Ascomycota    | Sordariomycetes | Hypocreales        | NA                   | <i>Acremonium</i>         | <i>Acremonium hennebertii</i>            |
| 594 | Ascomycota    | Dothideomycetes | Pleosporales       | Didymellaceae        | <i>Stagonosporopsis</i>   | <i>Stagonosporopsis cucurbitacearum</i>  |
| 595 | Ascomycota    | Dothideomycetes | Pleosporales       | Pleosporaceae        | NA                        | Pleosporaceae sp. 1 ICMP 18944           |
| 596 | Ascomycota    | Dothideomycetes | Capnodiales        | Mycosphaerellaceae   | <i>Phaeothecoidea</i>     | <i>Phaeothecoidea melaleuca</i>          |
| 597 | Ascomycota    | Sordariomycetes | Hypocreales        | NA                   | <i>Eucasphaeria</i>       | <i>Eucasphaeria capensis</i>             |
| 598 | Ascomycota    | Eurotiomycetes  | Eurotiales         | Aspergillaceae       | <i>Penicillium</i>        | <i>Penicillium olsonii</i>               |
| 599 | Ascomycota    | Sordariomycetes | Diaporthales       | Valsaceae            | <i>Cytospora</i>          | <i>Cytospora</i> sp. 1 AE-2013           |
| 600 | Ascomycota    | Dothideomycetes | NA                 | NA                   | <i>Sclerostagonospora</i> | <i>Sclerostagonospora</i> sp. CBS 118224 |
| 601 | NA            | NA              | NA                 | NA                   | NA                        | fungal sp. F292                          |
| 602 | Ascomycota    | Dothideomycetes | Capnodiales        | Cladosporiaceae      | <i>Cladosporium</i>       | <i>Cladosporium</i> sp. F2               |

| OTU | phylum        | class           | order             | family               | genus                     | species                                    |
|-----|---------------|-----------------|-------------------|----------------------|---------------------------|--------------------------------------------|
| 603 | Basidiomycota | Agaricomycetes  | Agaricales        | Entolomataceae       | <i>Clitopilus</i>         | <i>Clitopilus kamaka</i>                   |
| 604 | Ascomycota    | Dothideomycetes | Capnodiales       | Cladosporiaceae      | <i>Cladosporium</i>       | <i>Cladosporium</i> sp. CF5                |
| 605 | Ascomycota    | Dothideomycetes | Patellariales     | NA                   | <i>Hysteropatella</i>     | <i>Hysteropatella elliptica</i>            |
| 606 | Ascomycota    | Dothideomycetes | Pleosporales      | NA                   | NA                        | Pleosporales sp. E-000535712               |
| 607 | Ascomycota    | Dothideomycetes | Dothideales       | Aureobasidiaceae     | <i>Aureobasidium</i>      | <i>Aureobasidium</i> sp. PPV3_2            |
| 608 | Ascomycota    | Eurotiomycetes  | Eurotiales        | Aspergillaceae       | <i>Penicillium</i>        | <i>Penicillium</i> sp. MAB-2010h           |
| 609 | Ascomycota    | Sordariomycetes | Xylariales        | Amphisphaeriaceae    | NA                        | Amphisphaeriaceae sp. 1 MLS-2010           |
| 610 | Ascomycota    | Dothideomycetes | Pleosporales      | Phaeosphaeriaceae    | <i>Parastagonospora</i>   | <i>Parastagonospora avenae</i>             |
| 611 | Ascomycota    | Dothideomycetes | Capnodiales       | Cladosporiaceae      | <i>Cladosporium</i>       | <i>Cladosporium cladosporioides</i>        |
| 612 | Ascomycota    | Sordariomycetes | Hypocreales       | Clavicipitaceae      | <i>Metarhizium</i>        | <i>Metarhizium anisopliae</i>              |
| 613 | Ascomycota    | Sordariomycetes | Sordariales       | Lasio-sphaeriaceae   | <i>Apodospora</i>         | <i>Apodospora peruviana</i>                |
| 614 | Basidiomycota | Tremellomycetes | Tremellales       | NA                   | <i>Cryptococcus</i>       | <i>Cryptococcus</i> sp. CBS 12710          |
| 615 | Ascomycota    | Dothideomycetes | Capnodiales       | NA                   | NA                        | Capnodiales sp. M-Camp2                    |
| 616 | NA            | NA              | NA                | NA                   | NA                        | fungal sp. TRN213                          |
| 617 | Ascomycota    | Sordariomycetes | Hypocreales       | Ophiocordycipitaceae | <i>Ophiocordyceps</i>     | <i>Ophiocordyceps sinensis</i>             |
| 618 | Ascomycota    | Sordariomycetes | Xylariales        | Xylariaceae          | <i>Xylaria</i>            | <i>Xylaria hypoxylon</i>                   |
| 619 | Ascomycota    | Sordariomycetes | Xylariales        | Xylariaceae          | <i>Nodulisporium</i>      | <i>Nodulisporium</i> sp. Et0502            |
| 620 | Basidiomycota | Tremellomycetes | Tremellales       | NA                   | <i>Bullera</i>            | <i>Bullera globospora</i>                  |
| 621 | Ascomycota    | Saccharomycetes | Saccharomycetales | Debaryomycetaceae    | <i>Candida</i>            | <i>Candida parapsilosis</i>                |
| 622 | Ascomycota    | Dothideomycetes | Capnodiales       | Teratosphaeriaceae   | <i>Xenoteratosphaeria</i> | <i>Xenoteratosphaeria jonkershoekensis</i> |
| 623 | Ascomycota    | Saccharomycetes | Saccharomycetales | Debaryomycetaceae    | <i>Candida</i>            | <i>Candida parapsilosis</i>                |
| 624 | Basidiomycota | Tremellomycetes | Tremellales       | NA                   | <i>Cryptococcus</i>       | <i>Cryptococcus mujuensis</i>              |
| 625 | Ascomycota    | Dothideomycetes | Capnodiales       | Dissoconiaceae       | <i>Ramichloridium</i>     | <i>Ramichloridium brasilianum</i>          |
| 626 | Ascomycota    | NA              | NA                | NA                   | NA                        | ascomycete sp. 15652-sp1                   |
| 627 | Ascomycota    | Dothideomycetes | Venturiales       | Symptoventuriaceae   | <i>Veronaeopsis</i>       | <i>Veronaeopsis simplex</i>                |
| 628 | NA            | NA              | NA                | NA                   | NA                        | fungal endophyte                           |
| 629 | Ascomycota    | Dothideomycetes | Pleosporales      | Phaeosphaeriaceae    | <i>Phaeosphaeria</i>      | cf. <i>Phaeosphaeria</i> sp. CPC 12881     |
| 630 | Ascomycota    | Saccharomycetes | Saccharomycetales | Debaryomycetaceae    | <i>Meyerozyma</i>         | <i>Candida carpophila</i>                  |
| 631 | Ascomycota    | Dothideomycetes | Capnodiales       | Cladosporiaceae      | <i>Cladosporium</i>       | <i>Cladosporium cladosporioides</i>        |
| 632 | Basidiomycota | Tremellomycetes | Tremellales       | Tremellaceae         | <i>Filobasidiella</i>     | <i>Cryptococcus amyloletus</i>             |
| 633 | Ascomycota    | Leotiomycetes   | NA                | NA                   | NA                        | Leotiomycetes sp. LAB-2013                 |
| 634 | Ascomycota    | Dothideomycetes | Pleosporales      | Pleosporaceae        | <i>Alternaria</i>         | <i>Alternaria longissima</i>               |

| OTU | phylum        | class           | order           | family             | genus                     | species                                         |
|-----|---------------|-----------------|-----------------|--------------------|---------------------------|-------------------------------------------------|
| 635 | Ascomycota    | Sordariomycetes | Xylariales      | Coniocessiaceae    | <i>Coniocessia</i>        | <i>Coniocessia maxima</i>                       |
| 636 | Ascomycota    | Dothideomycetes | Pleosporales    | Didymellaceae      | <i>Phoma</i>              | <i>Phoma tropica</i>                            |
| 637 | NA            | NA              | NA              | NA                 | NA                        | NA                                              |
| 638 | Ascomycota    | NA              | NA              | NA                 | NA                        | foliar endophyte of <i>Picea glauca</i> sp. A10 |
| 639 | Ascomycota    | Sordariomycetes | Hypocreales     | Bionectriaceae     | NA                        | Bionectriaceae sp. MS64                         |
| 640 | Ascomycota    | Dothideomycetes | Capnodiales     | Teratosphaeriaceae | <i>Xenopenidiella</i>     | <i>Xenopenidiella rigidophora</i>               |
| 641 | Ascomycota    | Dothideomycetes | Pleosporales    | Pleosporaceae      | <i>Alternaria</i>         | <i>Alternaria infectoria</i>                    |
| 642 | Ascomycota    | Dothideomycetes | Pleosporales    | NA                 | <i>Ochrocladosporium</i>  | <i>Ochrocladosporium elatum</i>                 |
| 643 | Ascomycota    | Lecanoromycetes | NA              | Physciaceae        | <i>Hyperphyscia</i>       | <i>Hyperphyscia adglutinata</i>                 |
| 644 | Ascomycota    | Dothideomycetes | Pleosporales    | Pleosporaceae      | <i>Alternaria</i>         | <i>Alternaria</i> sp. XF6                       |
| 645 | NA            | NA              | NA              | NA                 | NA                        | fungal sp. NW-AN003                             |
| 646 | Ascomycota    | Dothideomycetes | Capnodiales     | Teratosphaeriaceae | <i>Devriesia</i>          | <i>Devriesia</i> sp. 45NNYY8ZZ1-11              |
| 647 | Ascomycota    | NA              | NA              | NA                 | <i>Torula</i>             | <i>Torula caligans</i>                          |
| 648 | Basidiomycota | Wallemiomycetes | Wallemiales     | NA                 | <i>Wallemia</i>           | <i>Wallemia sebi</i>                            |
| 649 | Ascomycota    | Dothideomycetes | Capnodiales     | Teratosphaeriaceae | <i>Devriesia</i>          | <i>Devriesia imbrexigena</i>                    |
| 650 | Ascomycota    | Dothideomycetes | Dothideales     | Aureobasidiaceae   | <i>Aureobasidium</i>      | <i>Aureobasidium pullulans</i>                  |
| 651 | Ascomycota    | Dothideomycetes | Pleosporales    | Phaeosphaeriaceae  | <i>Phaeosphaeria</i>      | <i>Phaeosphaeria</i> sp. JP-2013                |
| 652 | Basidiomycota | Tremellomycetes | Tremellales     | NA                 | <i>Cryptococcus</i>       | <i>Cryptococcus victoriae</i>                   |
| 653 | Basidiomycota | Tremellomycetes | Tremellales     | NA                 | <i>Kwoniella</i>          | <i>Kwoniella heveanensis</i>                    |
| 654 | Ascomycota    | Dothideomycetes | Capnodiales     | Cladosporiaceae    | <i>Toxicocladosporium</i> | <i>Toxicocladosporium strelitziae</i>           |
| 655 | Ascomycota    | Dothideomycetes | Capnodiales     | Mycosphaerellaceae | <i>Passalora</i>          | <i>Passalora ageratinae</i>                     |
| 656 | NA            | NA              | NA              | NA                 | NA                        | fungal sp. ARIZ L365                            |
| 657 | Ascomycota    | Dothideomycetes | Capnodiales     | Mycosphaerellaceae | NA                        | Mycosphaerellaceae sp. UFMGCB 5851              |
| 658 | Ascomycota    | Sordariomycetes | Hypocreales     | NA                 | <i>Acremonium</i>         | <i>Acremonium sclerotigenum</i>                 |
| 659 | Ascomycota    | NA              | NA              | NA                 | <i>Acremonium</i>         | <i>Acremonium charticola</i>                    |
| 660 | Ascomycota    | Dothideomycetes | Pleosporales    | NA                 | NA                        | Pleosporales sp. HF-10                          |
| 661 | Basidiomycota | Tremellomycetes | Tremellales     | NA                 | <i>Cryptococcus</i>       | <i>Cryptococcus cuniculi</i>                    |
| 662 | Ascomycota    | NA              | NA              | NA                 | <i>Acremonium</i>         | <i>Acremonium</i> sp. CBS 115996                |
| 663 | Ascomycota    | Sordariomycetes | Calosphaeriales | Calosphaeriaceae   | <i>Phaeoacremonium</i>    | <i>Phaeoacremonium</i> sp. Pm19                 |
| 664 | NA            | NA              | NA              | NA                 | NA                        | fungal sp. BOER-OM-2C                           |
| 665 | Ascomycota    | Eurotiomycetes  | Eurotiales      | Aspergillaceae     | <i>Penicillium</i>        | <i>Penicillium shearii</i>                      |
| 666 | Ascomycota    | Dothideomycetes | Pleosporales    | Didymosphaeriaceae | <i>Paraconiothyrium</i>   | <i>Paraconiothyrium hawaiiense</i>              |

| OTU | phylum        | class                | order             | family              | genus                    | species                                                 |
|-----|---------------|----------------------|-------------------|---------------------|--------------------------|---------------------------------------------------------|
| 667 | Ascomycota    | Dothideomycetes      | Capnodiales       | Mycosphaerellaceae  | <i>Neomycosphaerella</i> | <i>Neomycosphaerella pseudopentameridis</i>             |
| 668 | Ascomycota    | Dothideomycetes      | Capnodiales       | Cladosporiaceae     | <i>Rachicladosporium</i> | <i>Rachicladosporium mcmurdoii</i>                      |
| 669 | Ascomycota    | Dothideomycetes      | Capnodiales       | Dissoconiaceae      | <i>Uwebraunia</i>        | <i>Uwebraunia dekkeri</i>                               |
| 670 | Ascomycota    | Eurotiomycetes       | Chaetothyriales   | Herpotrichiellaceae | <i>Cladophialophora</i>  | <i>Cladophialophora</i> sp. Sh20                        |
| 671 | Ascomycota    | Dothideomycetes      | Capnodiales       | Mycosphaerellaceae  | <i>Passalora</i>         | <i>Passalora intermedia</i>                             |
| 672 | Ascomycota    | Dothideomycetes      | Capnodiales       | Cladosporiaceae     | <i>Cladosporium</i>      | <i>Cladosporium</i> sp. JS1043                          |
| 673 | Basidiomycota | Agaricostilbomycetes | NA                | NA                  | <i>Sterigmatomyces</i>   | <i>Sterigmatomyces elviae</i>                           |
| 674 | Ascomycota    | Dothideomycetes      | Pleosporales      | Didymellaceae       | <i>Phoma</i>             | <i>Phoma dictamnica</i>                                 |
| 675 | Ascomycota    | Dothideomycetes      | Hysteriales       | Hysteriaceae        | <i>Rhytidhysteron</i>    | <i>Rhytidhysteron rufulum</i>                           |
| 676 | Ascomycota    | Dothideomycetes      | Myriangiales      | Elsinoaceae         | NA                       | Elsinoaceae sp. ZLY-2010b                               |
| 677 | Ascomycota    | Dothideomycetes      | Pleosporales      | Pleosporaceae       | <i>Alternaria</i>        | <i>Alternaria alternata</i>                             |
| 678 | Ascomycota    | Dothideomycetes      | Pleosporales      | Cucurbitariaceae    | <i>Pyrenochaeta</i>      | <i>Pyrenochaeta</i> sp. GCG2(1)                         |
| 679 | Ascomycota    | Saccharomycetes      | Saccharomycetales | Debaryomycetaceae   | <i>Candida</i>           | <i>Candida parapsilosis</i>                             |
| 680 | Basidiomycota | Agaricomycetes       | Agaricales        | Tricholomataceae    | <i>Hemimycena</i>        | <i>Hemimycena tortuosa</i>                              |
| 681 | Ascomycota    | Dothideomycetes      | Capnodiales       | Teratosphaeriaceae  | <i>Teratosphaericola</i> | <i>Teratosphaericola pseudaficana</i>                   |
| 682 | Ascomycota    | Eurotiomycetes       | Chaetothyriales   | Cyphellophoraceae   | <i>Cyphellophora</i>     | <i>Cyphellophora</i> cf. <i>pluriseptata</i> CBS 285.85 |
